1 **Non-coding germline *GATA3* variants alter chromatin topology and contribute to**  
2 **pathogenesis of acute lymphoblastic leukemia**

3

4 Hongbo Yang<sup>1,2\*</sup>, Hui Zhang<sup>3,4,\*</sup>, Yu Luan<sup>1,\*</sup>, Tingting Liu<sup>1</sup>, Kathryn G Roberts<sup>5</sup>, Mao-  
5 xiang Qian<sup>3</sup>, Bo Zhang<sup>6</sup>, Wenjian Yang<sup>3</sup>, Virginia Perez-Andreu<sup>3,7</sup>, Jie Xu<sup>8</sup>, Sriranga  
6 Iyyanki<sup>8</sup>, Da Kuang<sup>9</sup>, Shalini C. Reshmi<sup>10,11</sup>, Julie Gastier-Foster<sup>10,11</sup>, Colton Smith<sup>3</sup>,  
7 Ching-Hon Pui<sup>12</sup>, William E Evans<sup>3</sup>, Stephen P Hunger<sup>13</sup>, Leonidas C. Plataniias<sup>2</sup>, Mary  
8 V Relling<sup>3</sup>, Charles G Mullighan<sup>5</sup>, Mignon L Loh<sup>14</sup>, Feng Yue<sup>1,2#</sup> & Jun J Yang<sup>3#</sup>

9

10 <sup>1</sup>Department of Biochemistry and Molecular Genetics, Feinberg School of Medicine  
11 Northwestern University, Chicago, Illinois, USA, <sup>2</sup>Robert H. Lurie Comprehensive Cancer  
12 Center of Northwestern University, Chicago, Illinois, USA, <sup>3</sup>Department of Pharmaceutical  
13 Sciences, St. Jude Children's Research Hospital, Memphis, Tennessee, USA,  
14 <sup>4</sup>Department of Pediatric Hematology/Oncology, Guangzhou Women and Children's  
15 Medical Center, Guangzhou, Guangdong, China, <sup>5</sup>Department of Pathology, St. Jude  
16 Children's Research Hospital, Memphis, Tennessee, USA, <sup>6</sup>Bioinformatics and Genomics  
17 Program, The Pennsylvania State University, University Park, Pennsylvania, USA,  
18 <sup>7</sup>Internal Medicine Department, MountainView Hospital, University of Reno, Las Vegas,  
19 Nevada, USA, <sup>8</sup>Department of Biochemistry and Molecular Biology, Penn State School of  
20 Medicine, Hershey, Pennsylvania, USA, <sup>9</sup>Department of Computer and Information  
21 Science, University of Pennsylvania, Philadelphia, Pennsylvania, USA, <sup>10</sup>Department of  
22 Pathology and Laboratory Medicine, Nationwide Children's Hospital, Columbus, Ohio,  
23 USA, <sup>11</sup>Department of Pediatrics, Ohio State University School of Medicine, Columbus,  
24 Ohio, USA, <sup>12</sup>Department of Oncology, St. Jude Children's Research Hospital, Memphis,  
25 Tennessee, USA, <sup>13</sup>Division of Oncology and the Center for Childhood Cancer Research,  
26 Children's Hospital of Philadelphia and the Perelman School of Medicine at the University  
27 of Pennsylvania, Philadelphia, PA, USA, <sup>14</sup>Department of Pediatrics, Benioff Children's  
28 Hospital and the Helen Diller Comprehensive Cancer Center, University of California, San  
29 Francisco, San Francisco, California, USA

30

31 \*These authors contributed equally to this work.

32 #Correspondence:

33 Jun J. Yang PhD at [jun.yang@stjude.org](mailto:jun.yang@stjude.org), Feng Yue PhD at [yue@northwestern.edu](mailto:yue@northwestern.edu)

34 **Abstract**

35 Inherited non-coding genetic variants confer significant disease susceptibility in many  
36 cancers. However, the molecular processes of by which germline variants contribute to  
37 somatic lesions are poorly understood. We performed targeted sequencing in 5,008  
38 patients and identified a key regulatory germline variant in *GATA3* strongly associated  
39 with Philadelphia chromosome-like acute lymphoblastic leukemia (Ph-like ALL). By  
40 creating an isogenic cellular model with CRISPR-Cas9 system, we showed that this  
41 variant activated a strong enhancer that significantly upregulated *GATA3* transcription,  
42 which in turn reshaped the global chromatin accessibility and 3D genome organization.  
43 Remarkably, this genotype switch induced a chromatin loop between the *CRLF2*  
44 oncogene and a distal enhancer, similar to the somatically acquired super-enhancer  
45 hijacking event in patients. *GATA3* genotype-related alterations in transcriptional control  
46 and 3D chromatin organization were further validated in Ph-like ALL patients. Finally, we  
47 showed that *GATA3* directly regulates *CRLF2* and potentiates the oncogenic effects of  
48 JAK-STAT signaling in leukemogenesis. Altogether, our results provide evidence for a  
49 novel mechanism by which a germline non-coding variant contributes to oncogene  
50 activation epigenetic regulation and 3D genome reprogramming.

## 51 **Introduction**

52 Acute lymphoblastic leukemia (ALL) is the most common cancer in children and there is  
53 growing evidence of inherited susceptibility to this hematological malignancy(Hunger and  
54 Mullighan, 2015; Moriyama et al., 2015; Pui et al., 2015). In particular, genome-wide  
55 association studies (GWAS) have identified at least 9 genomic loci (i.e., *CDKN2A/2B*,  
56 *IKZF1*, *ARID5B*, *CEBPE*, *PIP4K2A-BMI1*, *GATA3*, *TP63*, *LHPP*, and *ELK3*) with common  
57 variants that influence ALL risk(Papaemmanuil et al., 2009; Perez-Andreu et al., 2013;  
58 Sherborne et al., 2010; Trevino et al., 2009; Xu et al., 2013; Xu et al., 2015). These  
59 variants cumulatively confer a substantial increase of ALL risk(Xu et al., 2015), and  
60 explain a large proportion of the estimated heritability of this leukemia(Enciso-Mora et al.,  
61 2012). Interestingly, some ALL germline risk variants also co-segregate with specific  
62 acquired genomic abnormalities in leukemia(Perez-Andreu et al., 2013; Trevino et al.,  
63 2009; Walsh et al., 2013), suggesting intricate interactions between somatic and germline  
64 mutations during leukemogenesis. In particular, we have previously reported germline  
65 intronic variants in the *GATA3* gene associated with the risk of developing Philadelphia  
66 chromosome (Ph)-like ALL(Perez-Andreu et al., 2013), a subtype characterized by a  
67 leukemia gene expression profile resembling that of Ph-positive ALL with *BCR-ABL1*  
68 fusion(Den Boer et al., 2009; Roberts et al., 2014). Each copy of the *GATA3* risk allele  
69 increased the risk of Ph-like ALL by 3.25-fold. Because Ph-like ALL is associated with  
70 distinctive genomic lesions in the cytokine signaling pathway genes (e.g., 50% of cases  
71 harbor *CRLF2*-rearrangements)(Roberts et al., 2014), it raises the question whether  
72 germline genetic variation in *GATA3* is directly or indirectly involved in the deregulation  
73 of this pathway in ALL. So far, the exact variant that determines GWAS signal at the

74 *GATA3* locus remains unknown and the exact molecular process by which the variant(s)  
75 contribute to Ph-like ALL pathogenesis is also unclear.

76 Even though GWAS have identified a plethora of variants associated with diverse  
77 human traits and diseases with varying degree of effects(MacArthur et al., 2017), there is  
78 still an extreme paucity of examples that clearly demonstrate the molecular mechanisms  
79 linking risk alleles to disease pathogenesis. The main challenge is that the majority (>90%)  
80 of the disease or trait-associated variants are located in non-coding (intronic and/or  
81 intergenic) regions of the genome whose function remains largely uncharacterized. A  
82 recent work systematically analyzed ENCODE(ENCODE-Project-Consortium, 2012) and  
83 Epigenome Roadmap(Bernstein et al., 2010) data and showed that the majority of the  
84 non-coding variants are located inside regulatory elements (e.g., promoter, enhancer, and  
85 silencer)(Maurano et al., 2012), raising the possibility that genetic variants at these sites  
86 may play a regulatory role and modulate local and/or distal gene transcription. Another  
87 challenge in dissecting the regulatory roles of the non-coding elements is how to identify  
88 their target genes, as it has been shown that enhancers can function from either upstream  
89 or downstream of their target genes, from as far as 1 million base pairs away through  
90 chromatin looping(Lettice et al., 2003). Recent high-throughput methods based on  
91 chromatin conformation capture such as Hi-C presented an unprecedented opportunity  
92 to study the effects of the non-coding elements on higher-order chromatin structure in a  
93 genome-wide fashion(Dixon et al., 2012; Lieberman-Aiden et al., 2009).

94 In this work, we sought to systematically identify *GATA3* variants in Ph-like ALL by  
95 targeted sequencing in 5,008 ALL patients and functionally investigate the underlying

96 mechanism of how they affect chromatin 3-dimensional structure, influence cell signaling,  
97 and contribute to leukemogenesis.

## 98 **Results**

### 99 **Identification of functional regulatory variants in *GATA3* loci in Ph-like ALL**

100 To comprehensively identify ALL risk variants at the *GATA3* locus, we performed targeted  
101 sequencing of a ~27 Kb genomic region at 10q14, encompassing exons, introns, and  
102 upstream/ downstream flanking regions of *GATA3*, in 5,008 children with ALL (including  
103 985 patients with Ph-like ALL status ascertained, **Table S1, Figure S1**). A total of 1,048  
104 variants were identified, of which 127 variants had a minor allele frequency >1% and were  
105 included in subsequent analyses (**Figure S1**). Comparing the frequency of each variant  
106 in Ph-like ALL (N=141) vs. non-Ph-like ALL (N=844), we identified three variants that were  
107 significantly associated with susceptibility to Ph-like ALL after correcting for multiple  
108 testings ( $P < 1 \times 10^{-5}$ ), all of which are non-coding. Variant rs3824662 in intron 3 showed  
109 the strongest association ( $P = 1.2 \times 10^{-8}$ , **Figure 1A**), and multivariate analysis conditioning  
110 on this SNP revealed no independent signals (**Figure S2**). Examining the chromatin state  
111 annotations of this genomic region across 42 cell and tissue types from the Roadmap  
112 Epigenomics Project (Zhou et al., 2015), we observed that rs3824662 is aligned with a  
113 putative enhancer in the hematopoietic tissues (i.e., enrichment of H3K27ac and  
114 H3K4me1 marks with an under-representation of H3K27me3 mark, **Figures 1B and S3A**).  
115 Taken together, these results pointed to rs3824662 as the likely functional and causal  
116 variants within an enhancer element that drives the association with Ph-like ALL at the  
117 *GATA3* locus.

118 To validate the enhancer function of this regulatory DNA element and investigate how its  
119 activity is influenced by rs3824662 genotype, we first tested the 1,120-bp fragment  
120 surrounding rs3824662 using a reporter gene assay in lymphoblastoid cells GM12878.  
121 The wildtype fragment (with the C allele) showed a modest enhancer effect, while the  
122 same fragment with the risk A allele robustly activated reporter gene transcription with  
123 three-fold increase over the vector control (**Figure 1C**, and similar results in other cell  
124 lines shown in **Figure S3B**), suggesting that the A allele is a gain-of-function variant.  
125 Similarly, in lymphoblastoid cell lines with heterozygous genotype at rs3824662 (i.e.,  
126 GM19119, GM19200, GM19209(McVicker et al., 2013)), we also observed a significant  
127 allele-biased histone modification, linking the A allele with an over-representation of the  
128 enhancer-associated H3K4me1 chromatin mark (**Figure 1D**). We then performed ATAC-  
129 Seq to profile open chromatin regions in seven primary leukemia samples from patient-  
130 derived xenografts of ALL with different rs3824662 genotypes (N=2, 3, and 2 for cases  
131 with A/A, A/C, and C/C genotype, respectively, **Table S3**). We observed that samples  
132 with the A/A genotype showed higher levels of open chromatin signals than those with  
133 A/C or C/C genotypes (**Figure 1E**). Furthermore, in three patients with heterozygous  
134 genotype at rs3824662, open chromatin signal at this locus exhibited clear allelic  
135 imbalance with the A allele preferentially linked to more chromatin accessibility (**Figure**  
136 **1F**). Similarly, in a panel of B-ALL cell lines of diverse molecular subtypes, we observed  
137 that samples with the A/A genotype showed higher levels of open chromatin signals than  
138 those with C/C genotype (**Figure S3C**). In fact, the strongest ATAC-seq signals at this  
139 locus were observed in two Ph-like ALL cell lines (MHH-CALL4 and MUTZ5), both of

140 which have A/A genotype at rs3824662, again suggesting that the A allele was associated  
141 a more transcriptionally active chromatin state.

#### 142 **rs3824662 risk A-allele upregulates *GATA3* expression**

143 To directly assess the effects of the rs3824662 genotype, we specifically knocked in the  
144 A allele at rs3824662 in the wildtype lymphoblastoid cell line GM12878, using CRISPR-  
145 Cas9 genome editing (**Figure S4A-S4C**). Engineered GM12878 cells with the variant  
146 allele (A/C or A/A genotype) showed 3.7- and 3.8-fold increase of *GATA3* expression  
147 compared with isogenic cells with the wildtype C/C genotype (**Figure S4D**). We then  
148 performed RNA-Seq and qPCR experiments to determine whether this variant can  
149 influence gene transcription in *cis*, and we focused on genes located within the same  
150 topologically associated domains (TADs) because it has been shown that effects of cis-  
151 regulatory elements are usually confined by the TAD boundaries(Dixon et al., 2012; Hnisz  
152 et al., 2016). Of the four genes within the rs3824662-containing TAD, only the expression  
153 of *GATA3* was significantly altered upon genome editing (**Figure 2A**), further indicating  
154 that this variant specifically regulates *GATA3* transcription. Further, by analyzing the RNA-  
155 seq results of the engineered GM12878 cells with heterozygous genotype at rs3824662,  
156 we noted significant allele-biased transcription of the *GATA3* (in favor of the T allele at  
157 coding variant rs2229359 *in cis* with the A allele at rs3824662, **Figure S5A-S5C**). This  
158 allelic expression pattern confirmed the cis regulatory effects of the rs3824662-  
159 containing enhancer. Further, we performed RNA-Seq in seven primary leukemia  
160 samples from ALL PDX and again confirmed that patients with A allele at rs3824662 is  
161 associated with higher *GATA3* expression (**Figure 2A** bottom panel). To define the target  
162 gene for this regulatory variant, we also performed Capture-C experiment to directly

163 identify the regions that interact with this enhancer and observed that it forms a strong  
164 chromatin loop with the *GATA3* promoter (**Figure 2B**, vertical yellow bar indicates the  
165 enhancer at the rs3824662 locus and pink bar indicates *GATA3* promoter). To pinpoint  
166 the transcription factor that preferentially binds to rs3824662 risk A allele, we performed  
167 footprint analysis using the high-depth ATAC-seq data from the MHH-CALL4 cells  
168 (rs3824662 A/A allele), and identified the NFIC motif proximal to the variant (chr10:  
169 8,104,196-8,104,208, **Figure S6A**). ChIP-qPCR of NFIC in GM12878 (WT) and  
170 GM12878 (A/A) cells also confirmed that this transcription factor preferentially bound to  
171 the A allele, at a level of 15-fold higher compared with the C allele (**Figure S6B**).

### 172 **rs3824662 risk A-allele induces novel GATA3 binding sites and reshapes global** 173 **chromatin accessibility landscape**

174 Having established that the rs3824662 risk allele upregulates *GATA3* gene expression,  
175 we next sought to determine the effects of increase in *GATA3* on global gene transcription  
176 and chromatin organization. Comparing genome-wide *GATA3* ChIP-Seq in engineered  
177 GM12878 cells (genotype C/C vs. A/A), we found that there was an overall increase in  
178 *GATA3* binding, with 4,715 novel binding sites in the engineered A/A clones compared to  
179 isogenic cells with wildtype C/C genotype (**Figure 2C**). These *GATA3* binding sites co-  
180 localized with regions that became accessible in GM12878 (A/A) cells as determined by  
181 ATAC-seq (**Figure 2C**): of the 4,715 gained *GATA3* binding sites, 2,650 were also  
182 identified as novel open chromatin regions created by the A allele in GM12878. In fact,  
183 these new *GATA3* binding sites were devoid of nucleosomes (**Figure S7A**), consistent  
184 with the notion that *GATA3* functions as a pioneer factor (Takaku et al., 2016) and may be  
185 driving the open chromatin status at these loci. Strikingly, these novel *GATA* binding sites



186 were also more likely to locate close to important Ph-like ALL genes, whose expression  
187 most strongly distinguished Ph-like ALL from other ALL subtypes(Harvey et al., 2010)  
188 (**Figure S7B**,  $p$ -value=0.0003, Wilcoxon test and **Figure S8A, S8B**). Interestingly, these  
189 novel GATA3 binding sites are significantly enriched for a panel of GWAS variants  
190 associated with different diseases. For example, 13 out 16 CLL-associated and 8 out of  
191 12 ALL-associated variants are located in these novel GATA3 binding sites (**Figure 2D**).  
192 Furthermore, in the engineered GM12878 (A/A) cells, GATA3 bound to genomic loci  
193 frequently targeted by chromosomal translocations in Ph-like ALL(Roberts et al., 2014)  
194 (e.g., *CSF1R*, *PDGFRB*) (**Figure S9**). Globally, there are 2,217 genes are differentially  
195 expressed in the GM12878 (A/A) cell line, with 1,209 upregulated and 1,008  
196 downregulated genes. GO term analysis showed that genes in the migration related  
197 pathways are preferentially activated in GM12878 cell line with the A/A genotype (**Figure**  
198 **2F**). GATA3 binding is also significant higher in upregulated genes, compared to  
199 downregulated genes in GM12878 (A/A) cells (**Figure 2G**,  $p$ -value<2.2e-16, Kolmogorov-  
200 Smirnov test).

### 201 **Up-regulated GATA3 leads to changes in 3D genome organization**

202 Recent analyses using Hi-C data identified two types of compartments in the human  
203 genome with distinctive patterns of chromatin interactions: compartment A (active) and  
204 compartment B (repressive) (Dixon et al., 2012; Lieberman-Aiden et al., 2009), and the  
205 A-to-B compartment switching is associated with extensive gene expression changes.  
206 Given the role of GATA3 as a pioneer factor, we postulated that elevated GATA3  
207 expression (as a result of the rs3824662) would also influence 3D chromatin organization  
208 on a genome-wide scale. Therefore, we performed Hi-C experiments in GM12878 (WT)

209 and also the engineered isogenic GM12878 (A/A) cells, and found that 4.07% of the  
210 genome underwent B-to-A compartment switch when the C allele at rs3824662 was  
211 replaced with the A allele (**Figure 3A**). Globally, B-to-A compartment switching resulted  
212 in upregulation of genes located in these regions (**Figure 3B**). Particularly notable was  
213 the *PON2* gene, which is among the most differentially expressed genes between Ph-like  
214 vs non-Ph-like ALL (Harvey et al., 2010). The *PON2* genomic locus underwent dramatic  
215 B-to-A compartment switching with a 6.258-fold increase in its expression (**Figure 3C**,  
216 upper panel), following the C-to-A allele substitution at rs3824662 in the GM12878 cell  
217 line. To further examine the functional consequences of the A allele in human primary  
218 leukemia cells, we performed Hi-C experiments in seven ALL PDX samples with different  
219 rs3824662 genotypes. Similar to what we observed in the GM12878 cell lines, we found  
220 that B-to-A compartment switch at the *PON2* locus was prominent in leukemia samples  
221 with the A/A genotype, along with transcription activation of the *PON2* gene (**Figure 3C**,  
222 bottom panel), whereas this region appeared transcriptionally inactive in WT patients.  
223 Leukemia cells with heterozygous genotype at rs3824662 exhibited intermediate  
224 phenotypes in this regard. Interestingly, Patient #4 who has a heterozygous genotype at  
225 rs3824662 showed a dramatic A compartment expansion, likely due to acquired  
226 translocation events in chr7 (**Figure S10A and S10B**), pointing to chromatin  
227 reorganization arising from somatic genomic abnormalities. Finally, ALL PDX samples  
228 containing the A allele clustered together based on whole-genome A/B compartment states  
229 (**Figure 3D**).

230 Although there was no significant genome-wide change at TAD level (**Figure S11A**  
231 **and S11B**), we observed a set of chromatin loops in engineered GM12878 cells (A/A

232 allele) and these loops are significantly enriched for GATA3 binding sites (**Figure 4A**).  
233 These novel interactions in GM12878 (A/A) cells also have longer interaction distance  
234 and are enriched with higher enhancer-promoter and promoter-promoter interaction,  
235 compared to GM12878 (WT) cells (**Figure 4B, 4C and S12**). Next, we examined the  
236 chromatin interactions for the *CRLF2* oncogene and found they formed a new loop that  
237 brought the *CRLF2* promoter to close proximity to a distal super enhancer in *P2RY8* with  
238 concomitant GATA3 binding (**Figure 4D**), which may have contributed to the increase of  
239 *CRLF2* transcription in the engineered A allele cells. This new interaction between *P2RY8*  
240 and *CRLF2* is also specifically detected in ALL patient PDX samples with risk-A alleles  
241 (**Figure 4E**). Strikingly, this new linkage between the *CRLF2* promoter and distal  
242 enhancer echos an enhancer hijacking event induced by an intrachromosomal  
243 rearrangement, which is one of the main mechanisms of *CRLF2* overexpression observed  
244 in ~25% cases of Ph-like ALL (Roberts et al., 2014).

245 Inspired by this observation, we performed motif analysis of all the common  
246 breakpoint regions in Ph-like ALL patients (Roberts et al., 2014), and we observed an  
247 enrichment of GATA3 motif (**Figure S13A**). Finally, we examined the GATA3 ChIP-seq  
248 signals surrounding the Ph-like breakpoints in both the GATA3-overexpressed Nalm-6  
249 ALL cells and engineered GM12878 cells, and again we observed an enrichment of  
250 GATA3 binding (**Figure S13B and S13C**). Taken together, these data provided evidence  
251 that GATA3 may be involved in chromosomal translocations in Ph-like ALL.

252 **GATA3 directly regulates CRLF2 pathways and contributes to the pathogenesis of**  
253 **Ph-like ALL**

254           When ectopically expressed in ALL cell lines, *GATA3* induced a gene expression  
255 pattern that overlaps with the expression signature of Ph-like ALL(Perez-Andreu et al.,  
256 2013). In particular, inducible overexpression of *GATA3* led to up-regulation of *CRLF2* in  
257 a time-dependent manner (**Figure 5A**), with concomitant gain of *GATA3* binding at the  
258 *CRLF2* promoter region overlapping with *CRLF2* rearrangement hotspots observed in Ph-  
259 like ALL (**Figure S14**). Conversely, down-regulation of *GATA3* by shRNA suppressed  
260 *CRLF2* transcription (**Figure 5B**), further indicating that *GATA3* functions as a  
261 transcriptional regulator of *CRLF2*. It has been shown that *CRLF2*-mediated constitutive  
262 activation of the JAK-STAT pathway is responsible for leukemogenesis in hematopoietic  
263 cells(Mullighan et al., 2009). Therefore, we hypothesized that *GATA3* acts upstream of  
264 *CRLF2*, and the germline *GATA3* variant can directly influence *CRLF2*-JAK signaling (by  
265 upregulating *GATA3* expression). To test this possibility, we examined the effects of  
266 *GATA3* on *in vitro* transforming potential and JAK-STAT signaling in mouse  
267 hematopoietic cell Ba/F3. *GATA3* overexpression resulted in upregulation of *CRLF2* and  
268 also led to phosphorylation of Jak2 and Stat5 (**Figure 5C**). Co-expression of *GATA3* and  
269 *JAK2<sup>R683G</sup>* were sufficient to induce cytokine-independent growth and Ba/F3 cell  
270 transformation, in a fashion analogous to co-expression of *CRLF2* and *JAK2<sup>R683G</sup>*  
271 although with a longer latency (**Figure 5D**). Interestingly, the addition of *CRLF2* ligand,  
272 TSLP, potentiated transforming effects of *GATA3* in Ba/F3 cells expressing mouse *Il7r*  
273 (Ba/F7 cells, **Figure S15**). These results strongly suggested that *GATA3* directly up-  
274 regulates *CRLF2* and thus impinges upon the pathogenesis of Ph-like ALL (**Figure 5E**).

## 275 **Discussion**

276 Both inherited germline and somatic genetic variations contribute to the pathogenesis of  
277 different malignancies, including leukemias. Somatic genomic aberrations, i.e., mutations,  
278 rearrangements, insertion/deletion, have been shown to drive overt leukemogenesis by  
279 promoting the survival and proliferation of pre-leukemia hematopoietic cells. However,  
280 the roles of inherited leukemia risk variants, especially those in intronic/intergenic loci,  
281 remain largely unclear. For example, GWAS studies have identified 9 genomic loci with  
282 common SNPs associated with susceptibility to childhood ALL, but there has been little  
283 progress to move from descriptive association studies to identifying causative  
284 mechanisms relating these variants to ALL pathogenesis.

285 Here we define the regulatory function of a non-coding SNP rs3824462 associated  
286 with Ph-like ALL (Perez-Andreu et al., 2013). This variant strongly influences the  
287 susceptibility to high-risk ALL and also prognosis, consistently across different ALL  
288 treatment regimens (Migliorini et al., 2013; Perez-Andreu et al., 2013). In this work, we  
289 first reported that the rs3824662 variant is located inside an enhancer element and the  
290 risk allele showed significantly increased enhancer activity. Introducing the risk A allele  
291 at rs3824662 by CRISPR/Cas9 editing in the wildtype GM12878 cells directly confirmed  
292 its enhancer effects on *GATA3* transcription. Using a variety of chromatin conformation  
293 capturing techniques, we further demonstrated that this variant significantly reshaped  
294 chromatin interactions both locally and also in a global fashion. A recent study showed  
295 that *GATA3* can act as a pioneer factor in the course of cellular reprogramming, making  
296 previously condensed chromatin more accessible by recruiting BRG1, a chromatin  
297 remodeling factor (Takaku et al., 2016). Similarly, our ATAC-seq data also suggested that

298 the C-to-A allele substitution at rs3824662 resulted in many newly-gained open chromatin  
299 regions enriched for GATA3 binding sites, coupled with global 3D genome re-organization.  
300 In particular, we observed hundreds of regions switched from the active and open  
301 compartment to the repressive and compacted compartment. Among them are many  
302 essential genes whose expression are altered in Ph-like ALL, likely due to the change of  
303 chromatin environment. We also performed ATAC-seq, GATA3 ChIP-seq and Hi-C in a  
304 panel of seven ALL patient samples with different genotypes at rs3824462. In these  
305 analyses, we identified similar B-to-A switching in *PON2* genes and novel looping events  
306 between *CRLF2* and *P2RY8* locus, indicating that these transcriptional regulation  
307 mechanisms are indeed operative in Ph-like ALL patients. However, these human  
308 leukemia samples harbor a plethora of somatic genomic abnormalities which likely  
309 confounded the effects from germline *GATA3* polymorphisms.

310 More interestingly, we found many *GATA3* binding sites are located near the  
311 breakpoints of translocation events observed in Ph-like ALL, suggesting its over-  
312 expression might be related with chromosomal instability and susceptibility to  
313 translocations. Therefore, we hypothesize that *GATA3* over-expression might facilitate  
314 enhancer hijacking, where a distal enhancer is rearranged to the proximity of oncogenes  
315 and leads to oncogenesis without gene fusions (Groschel et al., 2014; Hnisz et al., 2016;  
316 Northcott et al., 2014; Weischenfeldt et al., 2017). To further explore the role of *GATA3*  
317 in genome instability, we also explored its binding profile in breast cancer, as *GATA3*  
318 abnormal expression has also been reported in certain human breast cancer subtypes.  
319 We confirmed that *GATA3* binding is also enriched in a breast cancer cell line (T47D)  
320 translocation breakpoints region as well (**Figure S16A**). Moreover, we also observed

321 GATA3 and BRG1 co-localize at these translocation breakpoints (**Figure S16B and**  
322 **S16C**), suggesting potential intricate interactions between GATA3, BRG1 and genome  
323 instability.

324 Aberrantly high *GATA3* expression has been also identified in other B cell  
325 malignancies, such as classical Hodgkin lymphoma. Constitutive activation of NFkB and  
326 Notch-1 leads to higher *GATA3* expression in Reed Sternberg cells, which then  
327 contributes to cytokine secretion (especially IL13) and signaling typical in Hodgkin  
328 lymphoma(Stanelle et al., 2010). In contrast, *GATA3* is not expressed in normal B cells  
329 and in fact functions as a key regulator of lymphoid cell lineage commitment (B vs T  
330 cells)(Banerjee et al., 2013). The data we present in the current study points to novel  
331 roles of *GATA3* in global cellular reprogramming and pathogenesis of B-cell malignancies.

332 In conclusion, we report here that the inherited genetic variant rs3824662 is a cis-  
333 acting enhancer variant associated with *GATA3* transcription activation, which contributes  
334 to Ph-like ALL leukemogenesis through regulating *CRLF2* signaling. Our results suggest  
335 that transcription factor-mediated epigenomic reprogramming can directly influence  
336 oncogene activity, and may be an important mechanism by which germline genetic  
337 variants influence cancer risk.

338

339 **Methods**

340 **Patients**

341 In this study, 5,008 childhood ALL patients were enrolled on Children's Oncology Group  
342 (AALL0232(Larsen et al., 2016) and COG9904/9905/9906(Borowitz et al., 2008)) and St.  
343 Jude Children's Research frontline clinical trials(Pui et al., 2010). Germline DNA was  
344 extracted from bone marrow samples or peripheral blood obtained from children with ALL  
345 during remission. This study was approved by institutional review boards at St. Jude  
346 Children's Research Hospital and COG affiliated institutions and informed consent was  
347 obtained from parents, guardians, or patients, as appropriate. Ph-like ALL status was  
348 determined on the basis of global gene expression, as described previously(Perez-  
349 Andreu et al., 2013). Patient-derived xenografts of ALL were selected from the St. Jude  
350 PROPEL resource with genomic characterization and sample authentication described at  
351 <https://stjuderesearch.org/site/data/propel>

352 **GATA3 targeted sequencing**

353 Illumina dual-indexed libraries were created from the germline DNA of 5,008 children with  
354 ALL and pooled in sets of 96 before hybridization with customized Roche NimbleGene  
355 SeqCap EZ probes (Roche, Roche NimbleGen, Madison, WI, USA) to capture the GATA3  
356 genomic region. Quantitative PCR was used to define the appropriate capture product  
357 titer necessary to efficiently populate an Illumina HiSeq 2000 flow cell for paired-end 2 ×  
358 100 bp sequencing. Coverage of greater than 20 x depth was achieved across more than  
359 80% of the targeted regions for nearly all samples. Sequence reads in the FASTQ format  
360 were mapped and aligned using the Burrows-Wheeler Aligner (BWA)(Li and Durbin,  
361 2009), and genetic variants were called using the GATK pipeline (version 3.1)(Poplin et



362 al., 2017), as previously described, and annotated using the ANNOVAR(Wang et al.,  
363 2010) program with the annotation databases including RefSeq(O'Leary et al., 2016). All  
364 the *GATA3* non-silent variants were manually reviewed in the Integrative Genomics  
365 Viewer(Robinson et al., 2011). Association of genotype with Ph-like ALL status was  
366 examined following our established statistical procedure(Perez-Andreu et al., 2013), i.e.,  
367 comparing allele frequency in ALL cases with vs without the Ph-like gene expression  
368 signature, using the logistic regression test with genetic ancestry as covariables.

### 369 **Knock-in rs3824662 risk allele in GM12878**

370 sgRNA targeted rs3824662 locus was cloned into CRISPR-CAS9 vector PX458 (Addgene)(Ran  
371 et al., 2013) and co-transfected into GM12878 along with single-strand donor DNA which carries  
372 risk allele A (**Supplementary Table 2**). After 68h of transfection, GFP positive cells were sorted  
373 into 20 96-well plates (color BD FACS Aria SORP high-performance cell sorter). Half of cells from  
374 successfully expanded clones were transferred into 24-well plates and the genomic DNA of the  
375 rest cells was extracted for PCR rs3824662 region. Pst1 (NEB) restriction enzyme digestion was  
376 used to select the heterozygous or homozygous knock-in clones. Successful knock-in clones  
377 were confirmed by Sanger sequencing.

### 378 **3D chromatin structure mapping by Hi-C**

379 Hi-C in GM12878 cells and PDX samples were performed using the Arima-HiC kit as per  
380 the manufacturer's instructions. Briefly, 1 million GM12878 WT, A/A cells and PDX  
381 sample were fixed with 1% formaldehyde, digested with restriction enzyme, end-labeled  
382 with Biotin-14-dATP, and then followed by ligation. The ligated chromatin was reverse-  
383 crosslinked and sonicated by Covaris E220 to produce 300–500 bp fragments . Biotin  
384 labeled DNA fragments were isolated using dynabeads Streptavidin C1 beads and  
385 followed by end-repair, adenylation, adaptor ligation and PCR amplification. The quantity

386 of the library was measured by both BioAnalyzer (Agilent) and Kapa Library Quantification  
387 Kit (Kapa Biosystems). Finally, the library was performed pair-end 2x100bp high-  
388 throughput sequencing using HiSeq 2500 and Nova-seq (Illumina).

### 389 **Cytokine-dependent growth assay in Ba/F3 cells and Ba/F7 cells**

390 The full-length *GATA3* and *CRLF2* coding sequence were purchased from GE Healthcare  
391 and cloned into the cL20c-IRES-GFP lentiviral vector. cL20c-*CRLF2*-IRES-GFP was  
392 modified into cL20c-*CRLF2*-IRES-CFP, and lentiviral supernatants were produced by  
393 transient transfection of HEK-293T cells using calcium phosphate. The MSCV-*JAK2*<sup>R683G</sup>-  
394 IRES-GFP construct was a gift from Dr. Charles Mullighan at St. Jude Children's  
395 Research Hospital (Mullighan et al., 2009) and modified into MSCV-*JAK2*<sup>R683G</sup>-IRES-  
396 mCherry and retroviral particles were produced using 293T cells. Ba/F3 cells and Ba/F7  
397 cells were maintained in medium supplemented with 10 ng/ml recombinant mouse  
398 interleukin 3 (IL3) and interleukin 7 (IL7) (PeproTech), respectively. Ba/F3 or Ba/F7 cells  
399 were transduced with lentiviral supernatants expressing *GATA3*. GFP positive cells were  
400 sorted 48 hours after *GATA3* transduction and maintained in the IL3 medium for another  
401 24 hours before transfected by *JAK2*<sup>R683G</sup> retroviral supernatants. Forty-eight hours later,  
402 GFP/mCherry double positive cells were sorted and maintained in medium with  
403 respective cytokine for 48 hours. Cells transduced with empty vector, *JAK2*<sup>R683G</sup> or  
404 *JAK2*<sup>R683G</sup> and *CRLF2* were sorted out for controls. Then, cells were washed three times  
405 and grown in the absence of cytokine. For TSLP assay, cells are maintained in medium  
406 with 10 ng/ml TSLP but without IL3. Cell growth and viability were monitored daily by  
407 Trypan blue using a TC10 automated cell counter (BIO-RAD). Each experiment was  
408 performed three times.

409 Additional experimental details and data analyses are included in the **Supplementary**

410 **Methods.**

411

## 412 **Acknowledgements**

413 This work was supported by the US National Institutes of Health (CA21765, CA98543,  
414 CA114766, CA98413, CA180886, CA180899, GM92666, GM115279, and GM097119)  
415 and the American Lebanese Syrian Associated Charities. H.Z. is a St. Baldrick's  
416 International Scholar (grant 522589) and supported by the National Science Foundation  
417 of China (81300401). S.P.H. is the Jeffrey E. Perelman Distinguished Chair in Pediatrics  
418 at The Children's Hospital of Philadelphia. M.L.L. is the UCSF Benioff Chair of Children's  
419 Health and the Deborah and Arthur Ablin Chair of Pediatric Molecular Oncology. F.Y. is  
420 supported by 1R35GM124820, R01HG009906, U01CA200060 and R24DK106766. We  
421 thank the patients and parents who participated in the St. Jude and COG clinical trials  
422 included in this study, the clinicians and research staff at St Jude Children's Research  
423 Hospital and COG institutions.

## 424 **Author Contributions**

425 The study was conceived by JJ.Y. and F.Y., designed by JJ.Y., F.Y., H.Y. and H.Z., and  
426 supervised by JJ.Y. and F.Y.. H.Y. and T.L. performed the CRISPR Knock-in, Hi-C, ChIP-  
427 seq and ATAC-seq experiments in GM12878 and patient PDX samples under F.Y.'s  
428 supervision. H.Z. performed targeted-rescue in cohorts and leukemia transforming  
429 assay in Ba/F3 and Ba/F7 cells. Data preprocessing was conducted by Y.L., M.Q.,  
430 B.Z., W.Y. and H.Y.; statistical analyses by Y.L., H.Y. and H.Z.; data interpretation by JJ.Y.,  
431 F.Y., H.Y., H.Z., Y.L., T.L., M.Q., B.Z., Y.L., J.X., I.S., W.Y., KG. R., V.P-A., H.X., J. G-F.,  
432 C.S., C-H.P., W.E.E., M.V.R., S.P.H., C.G.M. and M.L.L. JJ.Y., F.Y., H.Y. and H.Z. wrote  
433 the manuscript; All authors approved the final version for publication.

434

## 435 Reference

- 436 Banerjee, A., Northrup, D., Boukarabila, H., Jacobsen, S. E., and Allman, D. (2013). Transcriptional  
437 repression of Gata3 is essential for early B cell commitment. *Immunity* 38, 930-942.
- 438 Bernstein, B. E., Stamatoyannopoulos, J. A., Costello, J. F., Ren, B., Milosavljevic, A., Meissner, A., Kellis,  
439 M., Marra, M. A., Beaudet, A. L., Ecker, J. R., *et al.* (2010). The NIH Roadmap Epigenomics Mapping  
440 Consortium. *Nature biotechnology* 28, 1045-1048.
- 441 Borowitz, M. J., Devidas, M., Hunger, S. P., Bowman, W. P., Carroll, A. J., Carroll, W. L., Linda, S., Martin, P.  
442 L., Pullen, D. J., Viswanatha, D., *et al.* (2008). Clinical significance of minimal residual disease in childhood  
443 acute lymphoblastic leukemia and its relationship to other prognostic factors: a Children's Oncology Group  
444 study. *Blood* 111, 5477-5485.
- 445 Den Boer, M. L., van Slegtenhorst, M., De Menezes, R. X., Cheok, M. H., Buijs-Gladdines, J. G., Peters, S. T.,  
446 Van Zutven, L. J., Beverloo, H. B., Van der Spek, P. J., Escherich, G., *et al.* (2009). A subtype of childhood  
447 acute lymphoblastic leukaemia with poor treatment outcome: a genome-wide classification study. *Lancet*  
448 *Oncol* 10, 125-134.
- 449 Dixon, J. R., Selvaraj, S., Yue, F., Kim, A., Li, Y., Shen, Y., Hu, M., Liu, J. S., and Ren, B. (2012). Topological  
450 domains in mammalian genomes identified by analysis of chromatin interactions. *Nature* 485, 376-380.
- 451 Enciso-Mora, V., Hosking, F. J., Sheridan, E., Kinsey, S. E., Lightfoot, T., Roman, E., Irving, J. A., Tomlinson,  
452 I. P., Allan, J. M., Taylor, M., *et al.* (2012). Common genetic variation contributes significantly to the risk of  
453 childhood B-cell precursor acute lymphoblastic leukemia. *Leukemia* 26, 2212-2215.
- 454 ENCODE-Project-Consortium (2012). An integrated encyclopedia of DNA elements in the human genome.  
455 *Nature* 489, 57-74.
- 456 Groschel, S., Sanders, M. A., Hoogenboezem, R., de Wit, E., Bouwman, B. A. M., Erpelinck, C., van der  
457 Velden, V. H. J., Havermans, M., Avellino, R., van Lom, K., *et al.* (2014). A single oncogenic enhancer  
458 rearrangement causes concomitant EVI1 and GATA2 deregulation in leukemia. *Cell* 157, 369-381.
- 459 Harvey, R. C., Mullighan, C. G., Wang, X., Dobbin, K. K., Davidson, G. S., Bedrick, E. J., Chen, I. M., Atlas, S.  
460 R., Kang, H., Ar, K., *et al.* (2010). Identification of novel cluster groups in pediatric high-risk B-precursor  
461 acute lymphoblastic leukemia with gene expression profiling: correlation with genome-wide DNA copy  
462 number alterations, clinical characteristics, and outcome. *Blood* 116, 4874-4884.
- 463 Hnisz, D., Weintraub, A. S., Day, D. S., Valton, A. L., Bak, R. O., Li, C. H., Goldmann, J., Lajoie, B. R., Fan, Z.  
464 P., Sigova, A. A., *et al.* (2016). Activation of proto-oncogenes by disruption of chromosome neighborhoods.  
465 *Science* 351, 1454-1458.
- 466 Hunger, S. P., and Mullighan, C. G. (2015). Acute Lymphoblastic Leukemia in Children. *N Engl J Med* 373,  
467 1541-1552.
- 468 Larsen, E. C., Devidas, M., Chen, S., Salzer, W. L., Raetz, E. A., Loh, M. L., Mattano, L. A., Jr., Cole, C., Eicher,  
469 A., Haugan, M., *et al.* (2016). Dexamethasone and High-Dose Methotrexate Improve Outcome for Children  
470 and Young Adults With High-Risk B-Acute Lymphoblastic Leukemia: A Report From Children's Oncology  
471 Group Study AALL0232. *J Clin Oncol* 34, 2380-2388.
- 472 Lettice, L. A., Heaney, S. J., Purdie, L. A., Li, L., de Beer, P., Oostra, B. A., Goode, D., Elgar, G., Hill, R. E., and  
473 de Graaff, E. (2003). A long-range Shh enhancer regulates expression in the developing limb and fin and is  
474 associated with preaxial polydactyly. *Hum Mol Genet* 12, 1725-1735.
- 475 Li, H., and Durbin, R. (2009). Fast and accurate short read alignment with Burrows-Wheeler transform.  
476 *Bioinformatics* 25, 1754-1760.
- 477 Lieberman-Aiden, E., van Berkum, N. L., Williams, L., Imakaev, M., Ragoczy, T., Telling, A., Amit, I., Lajoie,  
478 B. R., Sabo, P. J., Dorschner, M. O., *et al.* (2009). Comprehensive mapping of long-range interactions  
479 reveals folding principles of the human genome. *Science* 326, 289-293.

480 MacArthur, J., Bowler, E., Cerezo, M., Gil, L., Hall, P., Hastings, E., Junkins, H., McMahon, A., Milano, A.,  
481 Morales, J., *et al.* (2017). The new NHGRI-EBI Catalog of published genome-wide association studies  
482 (GWAS Catalog). *Nucleic Acids Res* 45, D896-D901.

483 Maurano, M. T., Humbert, R., Rynes, E., Thurman, R. E., Haugen, E., Wang, H., Reynolds, A. P., Sandstrom,  
484 R., Qu, H., Brody, J., *et al.* (2012). Systematic localization of common disease-associated variation in  
485 regulatory DNA. *Science* 337, 1190-1195.

486 McVicker, G., van de Geijn, B., Degner, J. F., Cain, C. E., Banovich, N. E., Raj, A., Lewellen, N., Myrthil, M.,  
487 Gilad, Y., and Pritchard, J. K. (2013). Identification of genetic variants that affect histone modifications in  
488 human cells. *Science* 342, 747-749.

489 Migliorini, G., Fiege, B., Hosking, F. J., Ma, Y., Kumar, R., Sherborne, A. L., da Silva Filho, M. I.,  
490 Vijayakrishnan, J., Koehler, R., Thomsen, H., *et al.* (2013). Variation at 10p12.2 and 10p14 influences risk  
491 of childhood B-cell acute lymphoblastic leukemia and phenotype. *Blood* 122, 3298-3307.

492 Moriyama, T., Relling, M. V., and Yang, J. J. (2015). Inherited genetic variation in childhood acute  
493 lymphoblastic leukemia. *Blood* 125, 3988-3995.

494 Mullighan, C. G., Collins-Underwood, J. R., Phillips, L. A., Loudin, M. G., Liu, W., Zhang, J., Ma, J., Coustan-  
495 Smith, E., Harvey, R. C., Willman, C. L., *et al.* (2009). Rearrangement of CRLF2 in B-progenitor- and Down  
496 syndrome-associated acute lymphoblastic leukemia. *Nat Genet* 41, 1243-1246.

497 Northcott, P. A., Lee, C., Zichner, T., Stutz, A. M., Erkek, S., Kawauchi, D., Shih, D. J., Hovestadt, V., Zaparka,  
498 M., Sturm, D., *et al.* (2014). Enhancer hijacking activates GF11 family oncogenes in medulloblastoma.  
499 *Nature* 511, 428-434.

500 O'Leary, N. A., Wright, M. W., Brister, J. R., Ciufo, S., Haddad, D., McVeigh, R., Rajput, B., Robbertse, B.,  
501 Smith-White, B., Ako-Adjei, D., *et al.* (2016). Reference sequence (RefSeq) database at NCBI: current status,  
502 taxonomic expansion, and functional annotation. *Nucleic Acids Res* 44, D733-745.

503 Papaemmanuil, E., Hosking, F. J., Vijayakrishnan, J., Price, A., Olver, B., Sheridan, E., Kinsey, S. E., Lightfoot,  
504 T., Roman, E., Irving, J. A., *et al.* (2009). Loci on 7p12.2, 10q21.2 and 14q11.2 are associated with risk of  
505 childhood acute lymphoblastic leukemia. *Nat Genet* 41, 1006-1010.

506 Perez-Andreu, V., Roberts, K. G., Harvey, R. C., Yang, W., Cheng, C., Pei, D., Xu, H., Gastier-Foster, J., E, S.,  
507 Lim, J. Y., *et al.* (2013). Inherited GATA3 variants are associated with Ph-like childhood acute lymphoblastic  
508 leukemia and risk of relapse. *Nat Genet* 45, 1494-1498.

509 Poplin, R., Ruano-Rubio, V., DePristo, M. A., Fennell, T. J., Carneiro, M. O., Van der Auwera, G. A., Kling, D.  
510 E., Gauthier, L. D., Levy-Moonshine, A., Roazen, D., *et al.* (2017). Scaling accurate genetic variant discovery  
511 to tens of thousands of samples. *bioRxiv*.

512 Pui, C. H., Pei, D., Sandlund, J. T., Ribeiro, R. C., Rubnitz, J. E., Raimondi, S. C., Onciu, M., Campana, D., Kun,  
513 L. E., Jeha, S., *et al.* (2010). Long-term results of St Jude Total Therapy Studies 11, 12, 13A, 13B, and 14 for  
514 childhood acute lymphoblastic leukemia. *Leukemia* 24, 371-382.

515 Pui, C. H., Yang, J. J., Hunger, S. P., Pieters, R., Schrappe, M., Biondi, A., Vora, A., Baruchel, A., Silverman,  
516 L. B., Schmiegelow, K., *et al.* (2015). Childhood Acute Lymphoblastic Leukemia: Progress Through  
517 Collaboration. *J Clin Oncol* 33, 2938-2948.

518 Ran, F. A., Hsu, P. D., Wright, J., Agarwala, V., Scott, D. A., and Zhang, F. (2013). Genome engineering using  
519 the CRISPR-Cas9 system. *Nat Protoc* 8, 2281-2308.

520 Roberts, K. G., Li, Y., Payne-Turner, D., Harvey, R. C., Yang, Y. L., Pei, D., McCastlain, K., Ding, L., Lu, C., Song,  
521 G., *et al.* (2014). Targetable kinase-activating lesions in Ph-like acute lymphoblastic leukemia. *N Engl J Med*  
522 371, 1005-1015.

523 Robinson, J. T., Thorvaldsdottir, H., Winckler, W., Guttman, M., Lander, E. S., Getz, G., and Mesirov, J. P.  
524 (2011). Integrative genomics viewer. *Nat Biotechnol* 29, 24-26.

525 Sherborne, A. L., Hosking, F. J., Prasad, R. B., Kumar, R., Koehler, R., Vijayakrishnan, J., Papaemmanuil, E.,  
526 Bartram, C. R., Stanulla, M., Schrappe, M., *et al.* (2010). Variation in CDKN2A at 9p21.3 influences  
527 childhood acute lymphoblastic leukemia risk. *Nat Genet* 42, 492-494.

528 Stanelle, J., Doring, C., Hansmann, M. L., and Kuppers, R. (2010). Mechanisms of aberrant GATA3  
529 expression in classical Hodgkin lymphoma and its consequences for the cytokine profile of Hodgkin and  
530 Reed/Sternberg cells. *Blood* *116*, 4202-4211.

531 Takaku, M., Grimm, S. A., Shimbo, T., Perera, L., Menafra, R., Stunnenberg, H. G., Archer, T. K., Machida,  
532 S., Kurumizaka, H., and Wade, P. A. (2016). GATA3-dependent cellular reprogramming requires activation-  
533 domain dependent recruitment of a chromatin remodeler. *Genome Biol* *17*, 36.

534 Trevino, L. R., Yang, W., French, D., Hunger, S. P., Carroll, W. L., Devidas, M., Willman, C., Neale, G.,  
535 Downing, J., Raimondi, S. C., *et al.* (2009). Germline genomic variants associated with childhood acute  
536 lymphoblastic leukemia. *Nat Genet* *41*, 1001-1005.

537 Walsh, K. M., de Smith, A. J., Chokkalingam, A. P., Metayer, C., Dahl, G. V., Hsu, L. I., Barcellos, L. F.,  
538 Wiemels, J. L., and Buffler, P. A. (2013). Novel childhood ALL susceptibility locus BMI1-PIP4K2A is  
539 specifically associated with the hyperdiploid subtype. *Blood* *121*, 4808-4809.

540 Wang, K., Li, M., and Hakonarson, H. (2010). ANNOVAR: functional annotation of genetic variants from  
541 high-throughput sequencing data. *Nucleic Acids Res* *38*, e164.

542 Weischenfeldt, J., Dubash, T., Drainas, A. P., Mardin, B. R., Chen, Y., Stutz, A. M., Waszak, S. M., Bosco, G.,  
543 Halvorsen, A. R., Raeder, B., *et al.* (2017). Pan-cancer analysis of somatic copy-number alterations  
544 implicates IRS4 and IGF2 in enhancer hijacking. *Nat Genet* *49*, 65-74.

545 Xu, H., Yang, W., Perez-Andreu, V., Devidas, M., Fan, Y., Cheng, C., Pei, D., Scheet, P., Burchard, E. G., Eng,  
546 C., *et al.* (2013). Novel susceptibility variants at 10p12.31-12.2 for childhood acute lymphoblastic leukemia  
547 in ethnically diverse populations. *J Natl Cancer Inst* *105*, 733-742.

548 Xu, H., Zhang, H., Yang, W., Yadav, R., Morrison, A. C., Qian, M., Devidas, M., Liu, Y., Perez-Andreu, V.,  
549 Zhao, X., *et al.* (2015). Inherited coding variants at the CDKN2A locus influence susceptibility to acute  
550 lymphoblastic leukaemia in children. *Nat Commun* *6*, 7553.

551 Zhou, X., Li, D., Zhang, B., Lowdon, R. F., Rockweiler, N. B., Sears, R. L., Madden, P. A., Smirnov, I., Costello,  
552 J. F., and Wang, T. (2015). Epigenomic annotation of genetic variants using the Roadmap Epigenome  
553 Browser. *Nat Biotechnol* *33*, 345-346.

554

555



556 **Figure legend**

557 **Figure 1. rs3824662 is the top *GATA3* variant associated with Ph-like ALL**  
558 **susceptibility and the leukemia risk allele (A) is associated with enhancer activity**  
559 **and open chromatin status.**

560 **A**, Genetic variants associated with Ph-like ALL at the *GATA3* locus discovered by  
561 targeted-sequencing. The purple dot indicates the variant with strongest association  
562 signal (rs3824662), and the blue box represents the 2.7 kb region flanking this variant. **B**,  
563 Chromatin state annotations from the Roadmap Epigenomics Project. Enhancer marks  
564 (H3K4me1 and H3K27ac) and repressive mark (H3K27me3) are plotted across 42 cell  
565 and tissue types for the *GATA3* genomic region. These epigenomic data suggest that  
566 rs3824662 is located inside a hematopoietic cell- specific enhancer element (red boxes).  
567 The upper panel shows the H3K27ac profiling in this region. The H3K27ac signals are  
568 averaged by different tissue-types and plotted in 100bp bins. **C**, Luciferase reporter assay  
569 comparing the enhancer activities of the fragments containing either the rs3824662 risk  
570 A allele or wildtype C allele in GM12878, an immortalized B lymphoblastoid cell line with  
571 normal karyotype. T bars indicate standard deviations. **D**, Allelic analysis of H3K4me1  
572 ChIP-seq data in three lymphoblastoid cell lines with heterozygous genotype at  
573 rs3824662 (GM12119, GM19200, and GM19219). Orange and blue bars indicate the  
574 percentage of ChIP-seq reads from the A allele and the C allele, respectively. **E**, Open  
575 chromatin status at the rs3824662 locus in 7 ALL PDX samples of different genotypes,  
576 as determined using ATAC-seq. The bottom panel represents a 2.8 kb region flanking  
577 rs3824662. **F**, Allelic analysis of ATAC-seq data in three Ph-like ALL samples with  
578 heterozygous genotype at rs3824662. Orange and blue bars indicate the percentage of



579 ATAC-seq reads from the A allele and the C allele, respectively (P3: 31 A vs 1 C reads,  
580 P4: 8 A vs 0 C reads, P5 : 6 A vs 1 C reads).

581

582 **Figure 2. The rs3824662 A allele increases *GATA3* expression and induces global**  
583 **gene expression changes in GM12878 cells and ALL PDX samples.**

584 **A**, *Cis* effects of rs3824662 on gene expression within the local topologically associating  
585 domain (TAD). Gene expression was quantified by qPCR for each gene in wildtype (C/C)  
586 and engineered GM12878 cells (A/A). TAD was defined using the GM12878 wildtype Hi-  
587 C data. Expressions are normalized against *BACTIN*. Only genes that are expressed in  
588 both GM12878 lines are presented. Bottom panel shows expression of the same panel  
589 of genes (as TPM) in 7 ALL PDX samples. **B**, Chromatin interactions between the  
590 rs3824662 (yellow bar) and *GATA3* promoter (red bar) as determined by Capture-C. **C**,  
591 Heatmap of *GATA3* ChIP-seq (*GATA3* binding) and ATAC-seq (open chromatin status)  
592 in GM12878 (WT) and engineered GM12878 (A/A) cells. Each row represents a 6kb  
593 genomic region flanking a *GATA3* binding site that is specific in engineered GM12878  
594 (A/A) cells. **D**, Enrichment of disease risk loci (i.e., disease GWAS hits) in *GATA3* binding  
595 sites gained in engineered GM12878 (A/A) cells. **E**, Differentially expressed genes (DEGs)  
596 between GM12878 (A/A) and GM12878 (WT) cell lines (1,209 upregulated genes vs  
597 1,008 downregulated genes. **F**, Gene Ontology analysis of DEGs. **G**, Genes up-regulated  
598 in the GM12878 (A/A) cell line are more significantly enriched for *GATA3* binding than  
599 those not affected or up-regulated in the GM12878 (WT) cells.

600

601 **Figure 3. Upregulation of *GATA3* expression leads to genome-wide A-B**  
602 **compartment reorganization.**

603 **A**, Engineered GM12878 (A/A) cells contain more active domains (Compartment A) than  
604 GM12878 (WT) cells (1,192,100,000 bp vs 1,145,890,000 bp). **B**, Genes located within  
605 regions that underwent the B-to-A compartment switch showed increased expression  
606 (wildtype vs A/A genotype,  $p$  value  $< 2.2e-16$  by Wilcoxon test). **C**, Ph-like ALL associated  
607 gene *PON2* locus underwent B-to-A switch in the engineered GM12878 (A/A) cells, with  
608 a 6.258-fold increase in *PON2* expression (upper panel). ALL PDX samples with risk A  
609 alleles also shows similar B-to-A switch in *PON2* locus (bottom panel). **D**, Genome-wide  
610 pattern of A/B compartment states in ALL PDX samples clustered according to genotype  
611 at rs3824662 (Pearson correlation coefficient). Pearson Correlation Coefficient matrix  
612 was generated based on the A/B compartment states using 10kb resolution. A  
613 compartments were defined as 1, and B compartments were defined as -1. Grey bar  
614 indicates *PON2* gene

615

616 **Figure 4. *GATA3* expression leads to new enhancer-promoter interactions,**  
617 **particularly in genes related to Ph-like ALL.**

618 **A**, APA plot indicates that *GATA3* binding are enriched in engineered GM12878 (A/A) cell  
619 specific chromatin loops. **B**, Distance distribution of chromatin loops specific to GM12878  
620 (A/A), GM12878 (WT), or common in both cell lines. **C**, Enhancer-Promoter and  
621 Promoter-Promoter are more enriched in the differential loops of engineered GM12878  
622 (A/A) cells. **D-E**, Virtual 4-C analysis (40kb resolution) shows there is a A/A genotype-  
623 specific chromatin looping between the *P2RY8* enhancer (pink bar) and the *CRLF2*

624 promoter (yellow bar) in engineered GM12878 (A/A) cells and also ALL PDX samples  
625 with A/A genotype. Red bar indicates the *P2RY8* super enhancer predicted by ROSE.

626

627 **Figure 5. GATA3 potentiates CRLF2-JAK-STAT signaling in hematopoietic cells.**

628 **A-B**, GATA3 regulates *CRLF2* transcription ALL cell line Nalm6 (overexpression in **A** and  
629 knockdown in **B**). The T bars indicate standard deviations ( $p$  value < 0.001 by 2-way  
630 ANOVA). **C**, JAK-STAT activation by GATA3. Mouse hematopoietic cell Ba/F3 was  
631 transduced with combinations of GATA3, *JAK2<sup>R683G</sup>*, and *CRLF2* as indicated, and  
632 cultured in the presence or absence of IL3. Phosphorylation of JAK2 and STAT5 was  
633 examined by immunoblotting with GAPDH as the loading control. **D**, IL3-independent  
634 growth of Ba/F3 cells transduced with GATA3 alone, *JAK2<sup>R683G</sup>* alone, GATA3 with  
635 *JAK2<sup>R683G</sup>*, *JAK2<sup>R683G</sup>* with *CRLF2*, or empty vector control. All the experiments were  
636 performed in triplicates ( $p$  value < 0.001 by 2way ANOVA). **E**, A schematic of our  
637 proposed model of how GATA3 rs3824662 variant contributes to pathogenesis of Ph-like  
638 ALL. Risk “A” allele induces GATA3 expression which binds to the *CRLF* promoter, loops  
639 *CRLF2* promoter to the super enhancer localized in *P2RY8* region, eventually resulting in  
640 *CRLF2* overexpression. The chromatin region between *CRLF2* promoter and *P2RY8*  
641 super enhancer also becomes more open and thus susceptible to damage (e.g.,  
642 rearrangements). Enh: enhancer; SE: super enhancer; Prom: promoter.

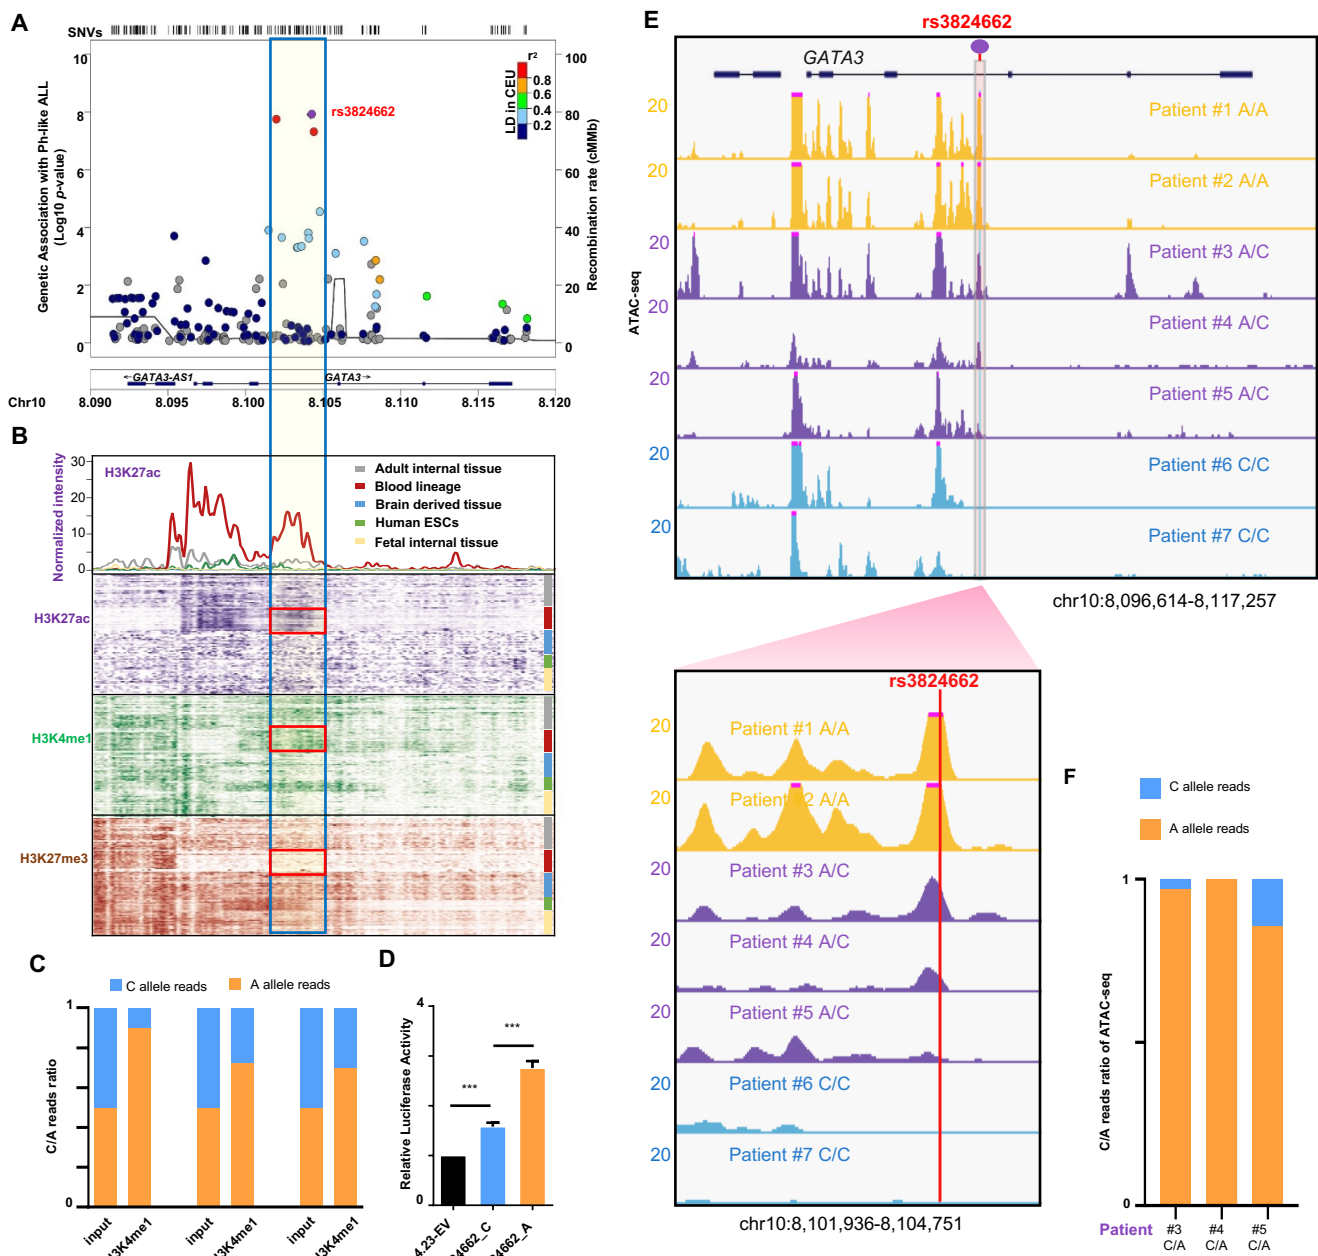

**Figure 1. rs3824662 is the top GATA3 variant associated with Ph-like ALL susceptibility and the leukemia risk allele (A) is associated with enhancer activity and open chromatin status.**

**A**, Genetic variants associated with Ph-like ALL at the GATA3 locus discovered by targeted-sequencing. The purple dot indicates the variant with strongest association signal (rs3824662), and the blue box represents the 2.7 kb region flanking this variant. **B**, Chromatin state annotations from the Roadmap Epigenomics Project. Enhancer marks (H3K4me1 and H3K27ac) and repressive mark (H3K27me3) are plotted across 42 cell and tissue types for the GATA3 genomic region. These epigenomic data suggest that rs3824662 is located inside a hematopoietic cell-specific enhancer element (red boxes). The upper panel shows the H3K27ac profiling in this region. The H3K27ac signals are averaged by different tissue-types and plotted in 100bp bins. **C**, Luciferase reporter assay comparing the enhancer activities of the fragments containing either the rs3824662 risk A allele or wildtype C allele in GM12878, an immortalized B lymphoblastoid cell line with normal karyotype. T bars indicate standard deviations. **D**, Allelic analysis of H3K4me1 ChIP-seq data in three lymphoblastoid cell lines with heterozygous genotype at rs3824662 (GM12119, GM19200, and GM19219). Orange and blue bars indicate the percentage of ChIP-seq reads from the A allele and the C allele, respectively. **E**, Open chromatin status at the rs3824662 locus in 7 ALL PDX samples of different genotypes, as determined using ATAC-seq. The bottom panel represents a 2.8 kb region flanking rs3824662. **F**, Allelic analysis of ATAC-seq data in three Ph-like ALL samples with heterozygous genotype at rs3824662. Orange and blue bars indicate the percentage of ATAC-seq reads from the A allele and the C allele, respectively (P3: 31 A vs 1 C reads, P4: 8 A vs 0 C reads, P5 : 6 A vs 1 C reads).

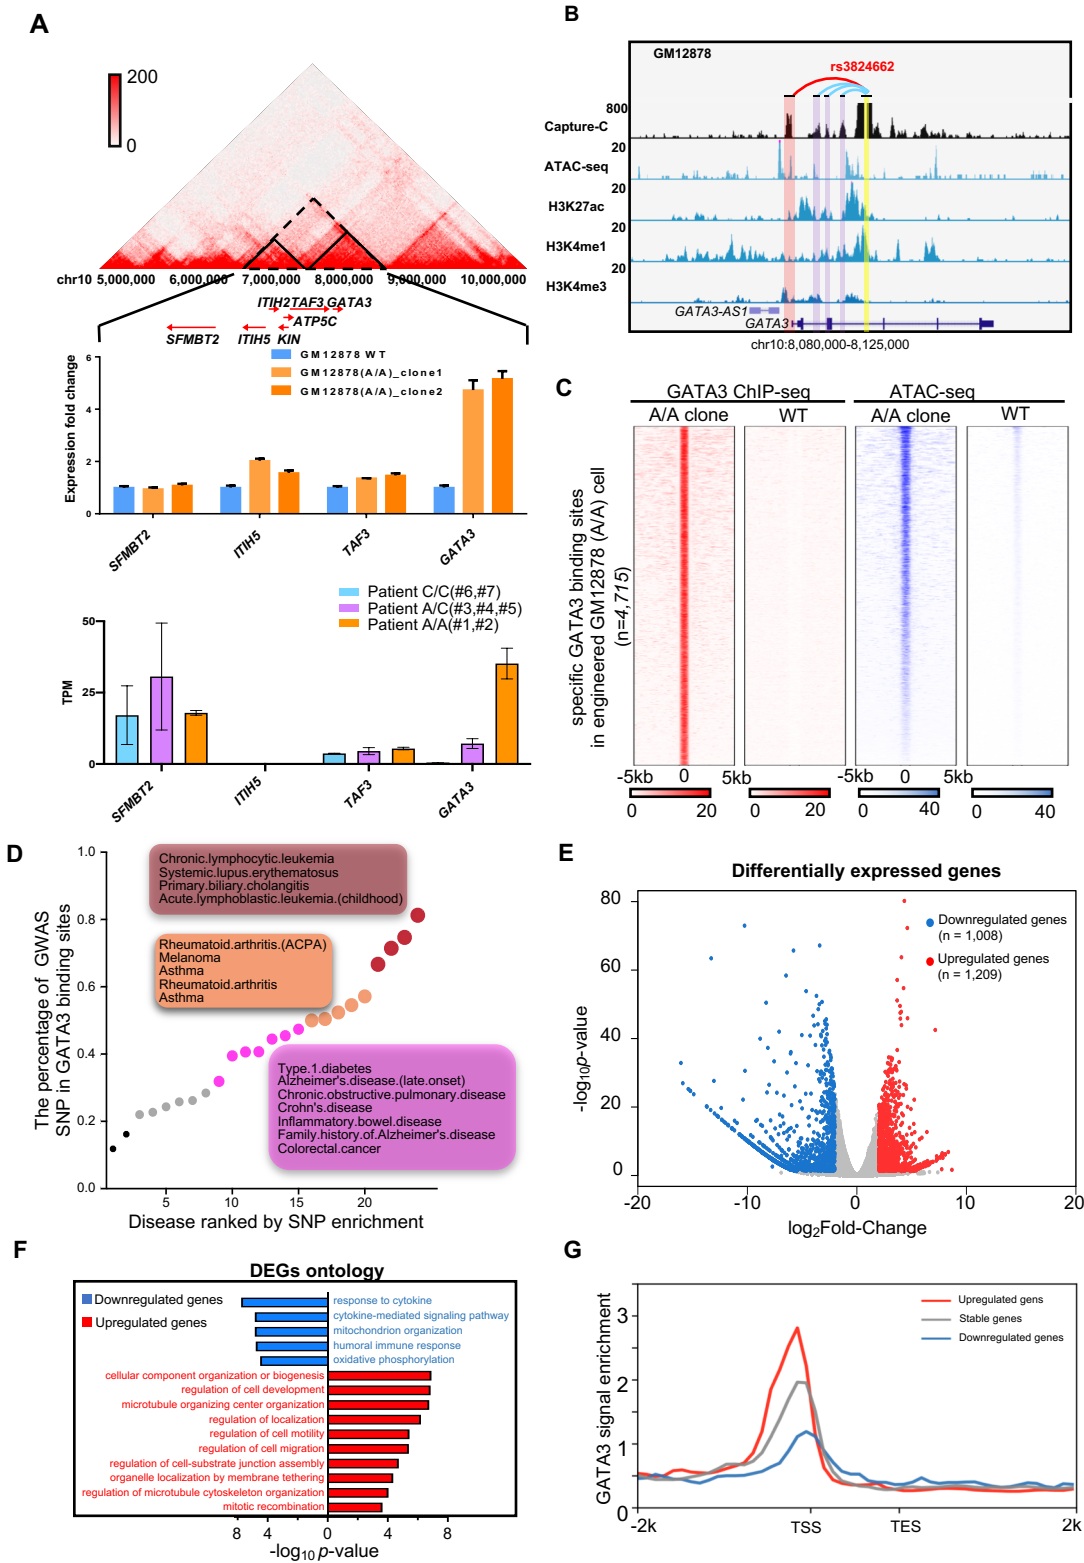

**Figure 2. The rs3824662 A allele increases *GATA3* expression and induces global gene expression changes in GM12878 cells and ALL PDX samples.**

**A**, *Cis* effects of rs3824662 on gene expression within the local topologically associating domain (TAD). Gene expression was quantified by qPCR for each gene in wildtype (C/C) and engineered GM12878 cells (A/A). TAD was defined using the GM12878 wildtype Hi-C data. Expressions are normalized against *BACTIN*. Only genes that are expressed in both GM12878 lines are presented. Bottom panel shows expression of the same panel of genes (as TPM) in 7 ALL PDX samples. **B**, Chromatin interactions between the rs3824662 (yellow bar) and *GATA3* promoter (red bar) as determined by Capture-C. **C**, Heatmap of *GATA3* ChIP-seq (*GATA3* binding) and ATAC-seq (open chromatin status) in GM12878 (WT) and engineered GM12878 (A/A) cells. Each row represents a 6kb genomic region flanking a *GATA3* binding site that is specific in engineered GM12878 (A/A) cells. **D**, Enrichment of disease risk loci (i.e., disease GWAS hits) in *GATA3* binding sites gained in engineered GM12878 (A/A) cells. **E**, Differentially expressed genes (DEGs) between GM12878 (A/A) and GM12878 (WT) cell lines (1,209 upregulated genes vs 1,008 downregulated genes). **F**, Gene Ontology analysis of DEGs. **G**, Genes up-regulated in the GM12878 (A/A) cell line are more significantly enriched for *GATA3* binding than those not affected or up-regulated in the GM12878 (WT) cells.

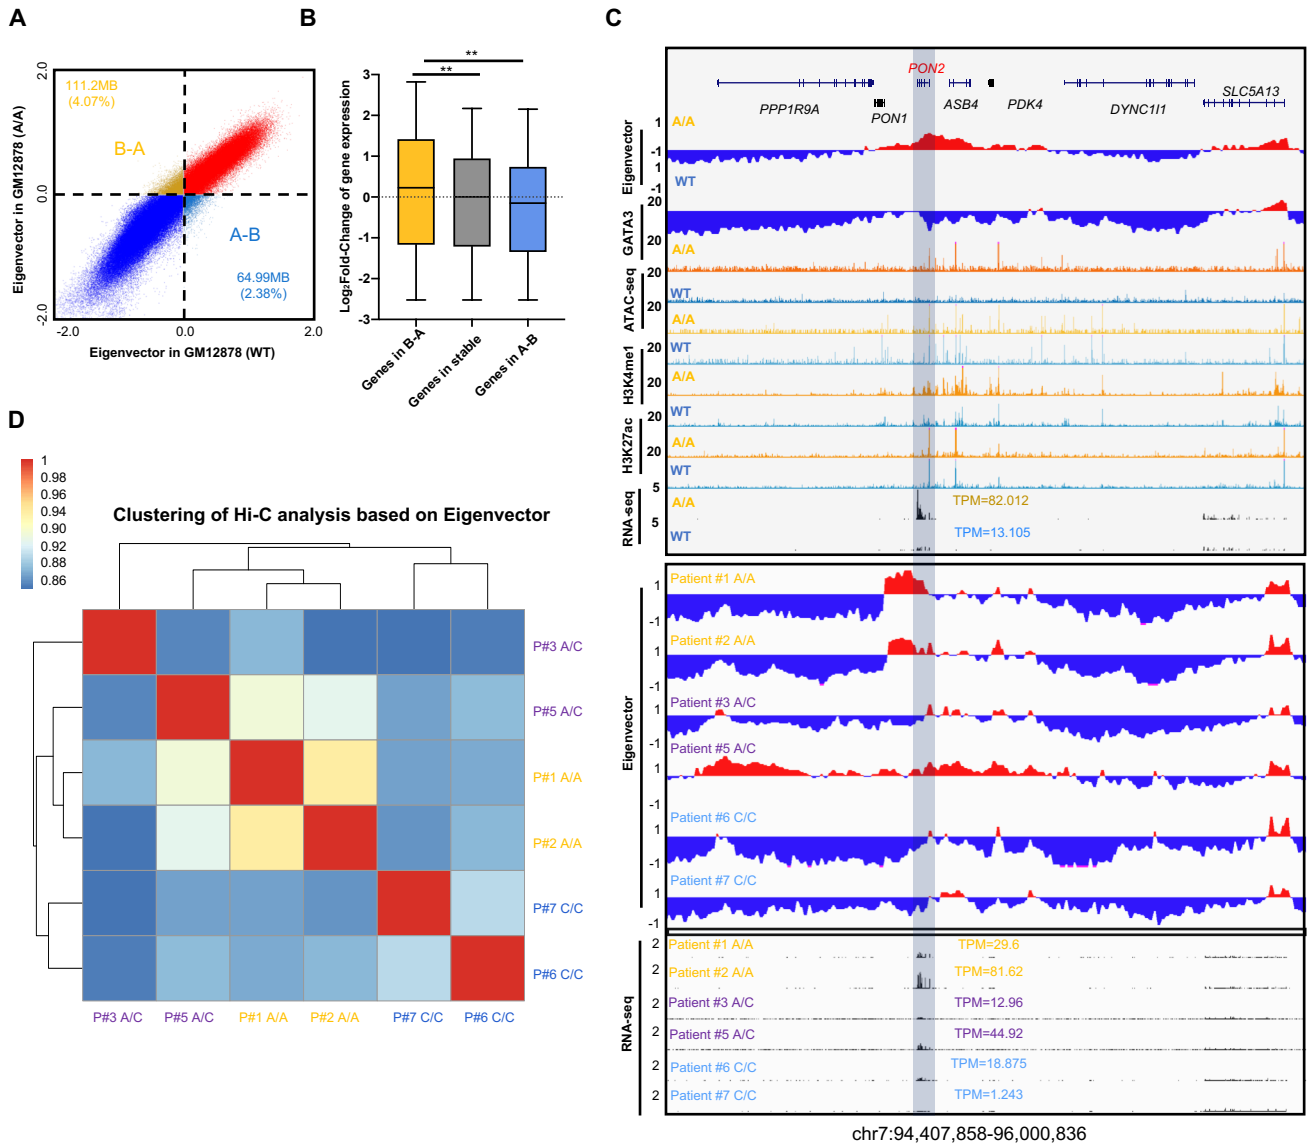

**Figure 3. Upregulation of *GATA3* expression leads to genome-wide A-B compartment reorganization.**

**A**, Engineered GM12878 (A/A) cells contain more active domains (Compartment A) than GM12878 (WT) cells (1,192,100,000 bp vs 1,145,890,000 bp). **B**, Genes located within regions that underwent the B-to-A compartment switch showed increased expression (wildtype vs A/A genotype,  $p$  value  $< 2.2e-16$  by Wilcoxon test). **C**, Ph-like ALL associated gene *PON2* locus underwent B-to-A switch in the engineered GM12878 (A/A) cells, with a 6.258-fold increase in *PON2* expression (upper panel). ALL PDX samples with risk A alleles also shows similar B-to-A switch in *PON2* locus (bottom panel). **D**, Genome-wide pattern of A/B compartment states in ALL PDX samples clustered according to genotype at rs3824662 (Pearson correlation coefficient). Pearson Correlation Coefficient matrix was generated based on the A/B compartment states using 10kb resolution. A compartments were defined as 1, and B compartments were defined as -1. Grey bar indicates *PON2* gene



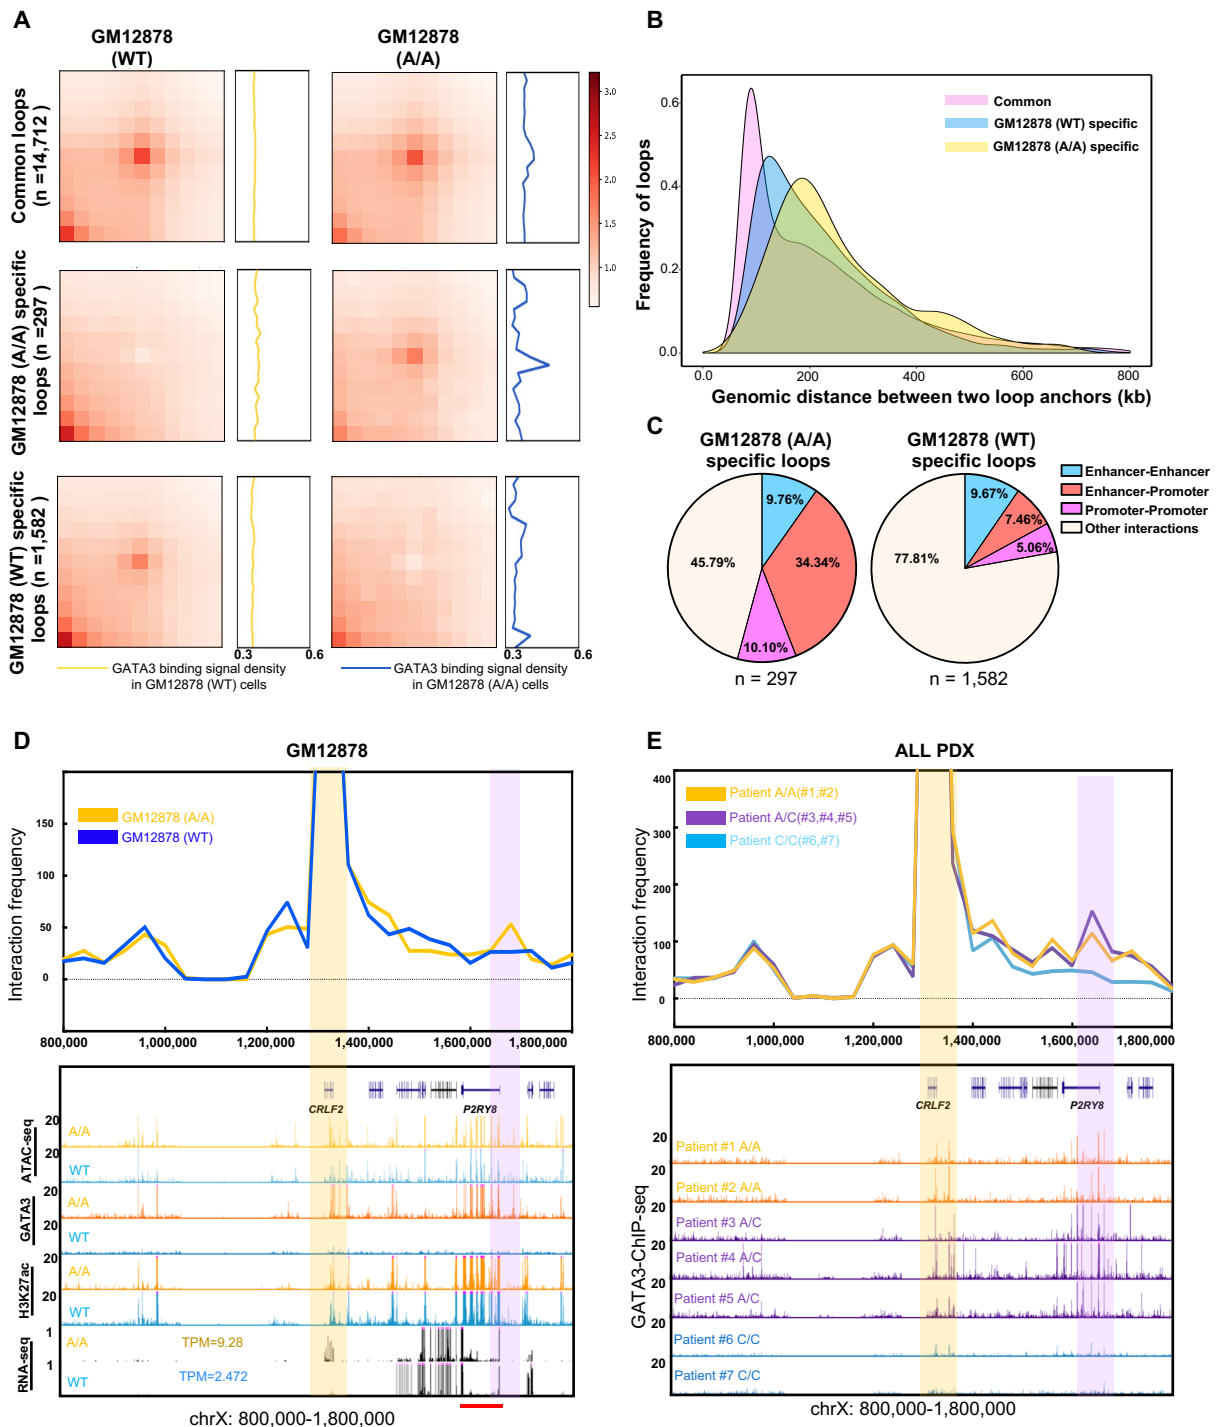

**Figure 4. GATA3 expression leads to new enhancer-promoter interactions, particularly in genes related to Ph-like ALL.**

**A**, APA plot indicates that GATA3 binding are enriched in engineered GM12878 (A/A) cell specific chromatin loops. **B**, Distance distribution of chromatin loops specific to GM12878 (A/A), GM12878 (WT), or common in both cell lines. **C**, Enhancer-Promoter and Promoter-Promoter are more enriched in the differential loops of engineered GM12878 (A/A) cells. **D-E**, Virtual 4-C analysis (40kb resolution) shows there is a A/A genotype-specific chromatin looping between the *P2RY8* enhancer (pink bar) and the *CRLF2* promoter (yellow bar) in engineered GM12878 (A/A) cells and also ALL PDX samples with A/A genotype. Red bar indicates the *P2RY8* super enhancer predicted by ROSE.

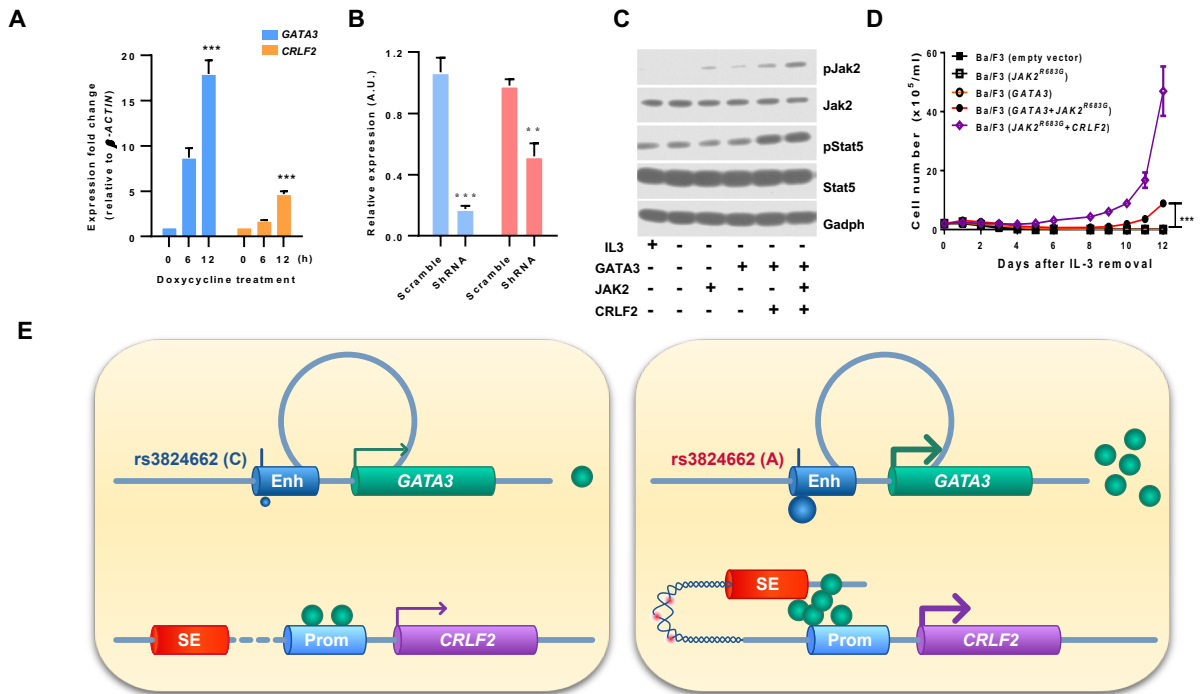

**Figure 5. GATA3 potentiates CRLF2-JAK-STAT signaling in hematopoietic cells.**

**A-B**, GATA3 regulates *CRLF2* transcription ALL cell line Nalm6 (overexpression in **A** and knockdown in **B**). The T bars indicate standard deviations ( $p$  value < 0.001 by 2-way ANOVA). **C**, JAK-STAT activation by GATA3. Mouse hematopoietic cell Ba/F3 was transduced with combinations of GATA3,  $JAK2^{R683G}$ , and *CRLF2* as indicated, and cultured in the presence or absence of IL3. Phosphorylation of JAK2 and STAT5 was examined by immunoblotting with GAPDH as the loading control. **D**, IL3-independent growth of Ba/F3 cells transduced with GATA3 alone,  $JAK2^{R683G}$  alone, GATA3 with  $JAK2^{R683G}$ ,  $JAK2^{R683G}$  with *CRLF2*, or empty vector. All the experiments were performed in triplicates ( $p$  value < 0.001 by 2way ANOVA). **E**, A schematic of our proposed model of how GATA3 rs3824662 variant contributes to pathogenesis of Ph-like ALL. Risk "A" allele induces GATA3 expression which binds to the *CRLF* promoter, loops *CRLF2* promoter to the super enhancer localized in *P2RY8* region, eventually resulting in *CRLF2* overexpression. The chromatin region between *CRLF2* promoter and *P2RY8* super enhancer also becomes more open and thus susceptible to damage (e.g., rearrangements). Enh: enhancer; SE: super enhancer; Prom: promoter.



## **Supplementary Methods**

### **Functional studies**

#### **Luciferase reporter gene assay**

A 1,120-bp region encompassing the *GATA3* SNP rs3824662 was amplified using CloneAmp HiFi PCR Premix (Clontech) (primer sequences in **Supplementary Table 4**) and then cloned into the pGL4.23-mini/P vector with a minimal SV40 promoter upstream of the firefly luciferase gene sequence. For reporter assays,  $2 \times 10^6$  SUP-B15, GM12878, Ba/F3 cells were resuspended in 100  $\mu$ l of Nucleofector Solution Kit V (Lonza) with the addition of 1.9  $\mu$ g of pGL4.23 constructs and 100ng of renilla pTK plasmid. Cells were electroporated and then incubated at 37°C for 24 hours with 5% CO<sub>2</sub>. Similarly, HEK293T cells ( $6 \times 10^4$ ) were plated on 96-well plate (flat bottom), and co-transduced with 95 ng pGL4.23 constructs and 5ng renilla pTK, and then incubated for 24 hrs. Luciferase activity was measured using the Dual-Glo Luciferase Assay system (Promega). Experiments were performed in triplicate. To control for cell number and transfection efficiency, firefly luciferase activity was normalized to renilla luciferase. Measurements were presented as a ratio relative to the activity of the pGL4.23-mini/P empty vector.

#### **Inducible *GATA3* overexpression and *GATA3* knockdown**

Full-length *GATA3* cDNA was cloned into the lentiviral vector pLV-tetON (a gift from Dr. Chunliang Li at St. Jude Children's Research Hospital). Nalm6 and SUP-B15 cells were transduced with pLV-*GATA3*-tetON for 48 hours and then subjected to bleomycin selection (0.5 mg/ml). Single clones were established in which doxycycline-induced *GATA3* overexpression was confirmed by RT-qPCR and immuno-blotting.

The lentiviral pLKO.1 constructs with *GATA3* shRNA and scrambled shRNA were purchased from Sigma-Aldrich. Nalm6 and SUP-B15 cells were lentivirally transduced with pLKO.1-*GATA3*-shRNA or scrambled shRNA for 48 hours and then subjected to puromycin selection (1.0 ug/ml). The degree of *GATA3* and *CRLF2* knockdown was evaluated by RT-qPCR.

### **Jak-Stat activation**

In transduced Ba/F3 cells, Jak-Stat pathway activation was evaluated by immunoblotting using anti-Jak2 antibody (Cell Signaling, 3230, 1:1000 dilution), anti-phospho-Jak2 antibody (Cell Signaling, 3771, 1:1,000 dilution), anti-Stat5 antibody (Cell Signaling, 9310, 1:1,000 dilution), and anti-phospho-Stat5 antibody (Cell Signaling, 9314, 1:1,000 dilution). Gadph was used as a loading control.

### **Transcriptomic and epigenomic profiling**

#### **RNA-seq**

Total RNAs were extracted from 5 million engineered GM12878 cells using Trizol (Invitrogen). cDNA libraries were prepared using SureSelect Strand Specific RNA Library Preparation Kit (Agilent). Briefly, polyA RNA was purified from 1000 ng of total RNA using oligo(dT) beads (Invitrogen) and then fragmented, followed by reverse transcription, end repair, adenylation, adaptor ligation and subsequent PCR amplification. The final product was checked by size distribution and concentration using BioAnalyzer High Sensitivity DNA Kit (Agilent) and Kapa Library Quantification Kit (Kapa Biosystems). Pair-end 2x50bp high-throughput sequencing was performed using HiSeq 2500 (Illumina). Expression of *GATA3*, *CRLF2*, *KIN*, *ENSG*, *SFMBT2*, *ITIH5*, *ITIH2*, *FAF3*, and *GATA-AS*

was also quantified by qRT-PCR with ACTIN as loading control (Primer sequences of indicated genes were listed in **Supplementary Table 4**).

### **ATAC-seq**

ATAC-seq was performed as previously described (Buenrostro et al., 2015). A total of 30,000-50,000 live cells were collected, washed once in PBS and resuspended in 50 ul ATAC-seq lysis buffer (10 mM Tris-HCl pH 7.4, 10 mM NaCl, 3 mM MgCl<sub>2</sub> and 0.1% IGEPAL CA-630) followed by immediate centrifugation for 10 min at 4 °C. Cell pellets were then resuspended in 50 ul reaction solution which contained 1XTD buffer and 2.5 ul Tn5 transposase (Illumina, FC-121-1030) and incubated at 37 °C for 60 mins. The fragmented DNA was purified by MinElute kit (Qiagen) and amplified by PCR. The final product was checked by size distribution and concentration using BioAnalyzer High Sensitivity DNA Kit (Agilent). Pair-end 2x50bp high-throughput sequencing was performed using HiSeq 2500 (Illumina).

### **ChIP-seq and ChIP-qPCR**

ChIP-seq and ChIP-qPCR were performed as previously described (Shen et al., 2012). Briefly, 100 ug chromatin was sonicated to 100-300 bp by Covaris E220, and 5 ug chromatin was used as input. Bead-antibody complex was prepared by incubating 11 ul of sheep anti-mouse IgG dynabeads (ThermoFisher, 11201D) or sheep anti-rabbit IgG dynabeads (ThermoFisher, 11203D) with 3ug of anti-H3K4me1 (Abcam, ab8895), anti-H3K27ac (Active motif, 39133), NF-1 (Santa Cruz, sc-74444), anti-GATA3 (Santa Cruz, sc268) or mouse IgG (ThermoFisher, 10400C), at 4°C for 4 hours with shaking. Then fragmented chromatin was incubated with bead-antibody complex overnight with shaking followed by stringent wash, elution and reverse crosslinking. For ChIP-seq, the

immunoprecipitated DNA and input DNA were processed by end repair, adenylation, adaptor ligation, PCR amplification and subsequent size selection using AMPure XP beads (Beckman). 2x50 or 2x100 bp high-throughput sequencing procedures were performed using HiSeq 2500 (Illumina). For ChIP-qPCR, the measurements of target loci binding enrichment by specific antibody and mouse IgG were normalized to input DNA, respectively.

### **Capture-C**

Capture-C was performed as previously described (Huang et al., 2017). Briefly, 10 million engineered or wildtype GM12878 cells were fixed with 1% formaldehyde and digested with DpnII (NEB), followed by DNA ligation. The ligated chromatin was then reverse-crosslinked, purified by phenol-chloroform and followed by sonication to produce 200–300 bp fragments using Covaris E220. Fragmented DNA was used to make libraries with the NEBNext DNA Library Prep Master Mix Set (NEB). Hybridization with 60 bp biotinylated capture probes (**Supplementary Table 5**) was performed with the xGen® Lockdown® Reagents (Integrated DNA Technologies). In brief, 3C libraries were dried and resuspended with hybridization reagents. 3 pmol pooled capture probes was mixed with the resuspended libraries and incubated for 72 hr at 47°C. After streptavidin beads purification and PCR, the pulldown material was treated with a second round of 24-hr incubation to improve specificity. The capture probes, ordered from Integrated DNA Technologies, flank DpnII sites proximal to rs3824662.

### **Data analyses**

#### **Sequencing QC**

TrimGalore (<https://github.com/FelixKrueger/TrimGalore>) was used to trim and filter all the illumina next generation sequencing fastq reads, including ChIP-seq, RNA-seq, Capture-C and HiC with the following parameters: -q 20 --phred33 --paired --trim-n (Supplementary Table 6-8).

### **Capture C process**

Capture C data were processed by Hi-C-Pro(Servant et al., 2015), we required one of the pairs should be mapped to the rs3824662 anchor regions. CHICAGO(Cairns et al., 2016) was used to assign significant interactions linked to the captured rs3824662 fragments.

### **RNA-seq data process**

STARv2.6.0(Dobin et al., 2013) was used to align RNA-seq data to female hg19 reference genomes ([https:// www.encodeproject.org/ files/ female.hg19/](https://www.encodeproject.org/files/female.hg19/)) with “outSAMtype BAM SortedByCoordinate-quantMode TranscriptomeSAM” parameters. The genome-wide signal coverage tracks were generated by using STARv2.5.3 with the “-outWigStrand Stranded” parameter. RSEM(Li and Dewey, 2011) (<https://github.com/deweylab/RSEM>) was used to quantify and calculate the expression values for known genes ([https:// www.gencodegenes.org/human/release\\_19.html](https://www.gencodegenes.org/human/release_19.html)). Genes with TPM value less than 1 in all samples were removed. DEseq2(Love et al., 2014) were used to identify differential expression genes with  $p$ -value<0.05 and  $\log_2$ Fold-change>2 as the cut-off. The GO term of differential expression genes was analyzed by Panther(<http://pantherdb.org/>).

### **ChIP-seq data process**

Pair-end sequencing data were mapped to the female reference genome (hg19) using bowtie2(version 2.3.4.3)(Langmead and Salzberg, 2012). Non-uniquely mapping reads (MAPQ<30) were removed, and PCR duplicate reads were removed by Picard

(<http://broadinstitute.github.io/picard/>). ENCODE-chip-seq-pipeline2 were followed to call the peaks, the narrow peaks with Poisson  $p$ -value greater than 0.001 were removed to ensure good quality peaks for further analysis. To further qualify the predicted peaks, Reads Per Million (RPM) of IP data and input data in each peak region were calculated and the qualified peaks should pass the threshold of two-fold enrichment ( $RPM_{IP}/RPM_{input}>2$ ) and  $RPM_{IP}-RPM_{input}>1$ . To check repeatability between biological replicates, firstly we divided the reference genomes into 10kb bins and computed the number of reads within each bin. The Pearson correlation coefficient between each biological replication was calculated using above-normalized 10kb bins reads. IDR with a threshold of 0.05 was used to measure the reproducibility of peaks from replicates(Li et al., 2011). The peaks were re-centered and set to a fixed width of 250 bp and identified differential GATA3 peaks using the DiffBind R package(Ross-Innes et al., 2012), The genome-wide ChIP-seq signal tracks were generated by MACS2(V2.2.4)(Zhang et al., 2008) for TFs and histone marks.

### **The GWAS hints enrichment analysis.**

The GWAS hints were download from <https://www.ebi.ac.uk/gwas/>. 10,279 disease-associated and at least identified by 2 articles single-nucleotide polymorphisms were selected. Investigated their distribution at differential GATA3 peaks 10kb flanking regions.

### **ATAC-seq data process**

Pair-end sequencing data were mapped to the female reference genome (hg19) using bowtie2(version 2.3.4.3)(Langmead and Salzberg, 2012) with -X 2000 parameter. Non-uniquely mapping reads (MAPQ<30) were removed, and PCR duplicate reads were

removed by Picard ( <http://broadinstitute.github.io/picard/>). ENCODE-atac-seq-pipeline were followed to call the peaks, the narrow peaks with Poisson p-value greater than 0.001 were removed to ensure good quality peaks for further analysis. To check repeatability between biological replicates, firstly we divided the reference genomes into 10kb bins and computed the number of reads within each bin. The Pearson correlation coefficient between each biological replication were calculated using above-normalized 10kb bins reads. IDR with a threshold of 0.05 was used to measure the reproducibility of peaks from replicates(Li et al., 2011). The genome-wide ATAC-seq signal tracks were generated by MACS2(V2.2.4)(Zhang et al., 2008) for TFs and histone marks. ATAC-seq peaks (called by MACS2 using parameters `--nomodel --broad --keep-dup all -shift-75 --extsize 150`) was merged with a 110 bp-window. Nucleosome position within these peak regions were then called using the NucleoATAC software(Schep et al., 2015) (<https://github.com/GreenleafLab/NucleoATAC>) version 0.3.4 with default parameters, and normalized nucleosome occupancy signal value was used to plot the nucleosome position profile. Footprint was identified by the HINT software (Hm-based IdeNtification of Transcription factor footprints)(Li et al., 2019) based on ATAC-seq data. Briefly, ATAC-seq narrowpeaks were used as input, the footprint region were filtered by footprint score>10, transcription factor motifs overlap with footprints was identified using the MOODS package (<https://github.com/jhkorhonen/MOODS>)(Korhonen et al., 2009), with motifs from the HOCOMOCO database (<http://hocomoco11.autosome.ru/>)(Kulakovskiy et al., 2018).

### **Hi-C data process**

The Hi-C data were aligned to the female reference genome(hg19) by bwa mem model(Li and Durbin, 2009) with -SP5M parameters. The PCR duplications and low-quality aligned pairs were removed by pairtools (<https://github.com/mirnylab/pairtools>), the “UU”, “UR” and “RU” types pair were kept for further analysis. We generated 5kb, 10kb, 25kb, 40kb,50kb,100kb multi-resolutions balanced cool file and hic file for visualization. Correlations between Hi-C replicates were calculated HiCRep(Yang et al., 2017). We combined biological replicates of Hi-c data from each engineered and GM12878 clone.

**A and B compartments** were identified using previously described(Lieberman-Aiden et al., 2009) with modifications. We construct raw 10kb Hi-C contact matrix without normalization of each cell type and patient, then calculated the expected interaction frequency between any two bins given the distance separating them in the genome. The observed/expected matrix was generated and then converted to a Pearson correlation matrix. Principal component analysis is applied to the correlation matrix similar as previously described. The value on first principal component for each bin was used to correlate with ATAC-seq signal to assign a genomic region to A or B compartment. If the sign of PC1 value changed between engineered GM12878 cell lines with different genotypes at rs3824662, we considered it as the A/B switch region.

**The insulation score** was calculated by the Perl script matrix2insulation.pl (Record Owner) at 40kb resolution matrix with “-ss 80000 --im iqrMean --is 480000 --ids 320000” parameters. The topologically associated domains were identified by the Perl script insulation2tads.pl, the 0.3 of min boundary strength was set as threshold.



**The interaction loops** were identified by Peakachu(Salameh et al., 2019) in 10kb resolutions, the models for predicting loops using H3K27ac 10% and CTCF 10% model. The predicted loops pass the probability score threshold great than 0.8. For the differential loops, we first calculated the probability score of each pair cross the genome, then we compare the probability score of predicted loops in sample A and probability score of pairs in sample B, we set 2-fold change as the cut off.

**The Virtual 4C plot** were used the embed method from the 3D genome browser(Wang et al., 2018). Briefly, a bait (for example, CRLF2 locus) and flanking region were chosen, then the row overlapping the bait and flanking regions were extracted from the Hi-C matrix. The number of observed contacts was plotted with a smoothing window to obtain virtual 4C profiles. To ensure the interaction frequency from different library comparable, the interactions in chromosome X were normalized by the number of interactions in viewpoints.

### **GATA3 and BRG1 binding in cancer breakpoints**

Ph-like patient breakpoints and T47D cancer cell line breakpoints were collected from previous study(Dixon et al., 2017; Reshmi et al., 2017) and expanded to +/- 1kb region. Motif enrichment analysis was performed using HOMER version 4.8 findMotifsGenome.pl function for exploring potential transcription factor binding within these expanded breakpoint regions. GATA3 binding signal in these expanded breakpoint regions was generated by deeptools using GATA3 ChIP-seq in the following cells: GM12878 C/C clone, GM12878 A/A clone, Nalm6, Nalm6\_gata3overexpressing and T47D breast cancer cell(Adomas et al., 2014). BRG1 ChIP-seq in T47D breast cancer cell were collected from GSE112491 are plotted the same way.

## Supplementary Reference

- Adomas, A. B., Grimm, S. A., Malone, C., Takaku, M., Sims, J. K., and Wade, P. A. (2014). Breast tumor specific mutation in GATA3 affects physiological mechanisms regulating transcription factor turnover. *BMC Cancer* *14*, 278.
- Buenrostro, J. D., Wu, B., Chang, H. Y., and Greenleaf, W. J. (2015). ATAC-seq: A Method for Assaying Chromatin Accessibility Genome-Wide. *Curr Protoc Mol Biol* *109*, 21.29.21-29.
- Cairns, J., Freire-Pritchett, P., Wingett, S. W., Várnai, C., Dimond, A., Plagnol, V., Zerbino, D., Schoenfelder, S., Javierre, B.-M., and Osborne, C. (2016). CHiCAGO: robust detection of DNA looping interactions in Capture Hi-C data. *Genome biology* *17*, 127.
- Dixon, J., Xu, J., Dileep, V., Zhan, Y., Song, F., Le, V. T., Yardimci, G. G., Chakraborty, A., Bann, D. V., Wang, Y., *et al.* (2017). An Integrative Framework For Detecting Structural Variations In Cancer Genomes. *bioRxiv*.
- Dobin, A., Davis, C. A., Schlesinger, F., Drenkow, J., Zaleski, C., Jha, S., Batut, P., Chaisson, M., and Gingeras, T. R. (2013). STAR: ultrafast universal RNA-seq aligner. *Bioinformatics* *29*, 15-21.
- Huang, P., Keller, C. A., Giardine, B., Grevet, J. D., Davies, J. O. J., Hughes, J. R., Kurita, R., Nakamura, Y., Hardison, R. C., and Blobel, G. A. (2017). Comparative analysis of three-dimensional chromosomal architecture identifies a novel fetal hemoglobin regulatory element. *Genes Dev* *31*, 1704-1713.
- Korhonen, J., Martinmaki, P., Pizzi, C., Rastas, P., and Ukkonen, E. (2009). MOODS: fast search for position weight matrix matches in DNA sequences. *Bioinformatics* *25*, 3181-3182.
- Kulakovskiy, I. V., Vorontsov, I. E., Yevshin, I. S., Sharipov, R. N., Fedorova, A. D., Rumynskiy, E. I., Medvedeva, Y. A., Magana-Mora, A., Bajic, V. B., Papatsenko, D. A., *et al.* (2018). HOCOMOCO: towards a complete collection of transcription factor binding models for human and mouse via large-scale ChIP-Seq analysis. *Nucleic Acids Res* *46*, D252-D259.
- Langmead, B., and Salzberg, S. L. (2012). Fast gapped-read alignment with Bowtie 2. *Nature methods* *9*, 357.
- Li, B., and Dewey, C. N. (2011). RSEM: accurate transcript quantification from RNA-Seq data with or without a reference genome. *BMC bioinformatics* *12*, 323.
- Li, H., and Durbin, R. (2009). Fast and accurate short read alignment with Burrows–Wheeler transform. *bioinformatics* *25*, 1754-1760.
- Li, Q., Brown, J. B., Huang, H., and Bickel, P. J. (2011). Measuring reproducibility of high-throughput experiments. *The annals of applied statistics* *5*, 1752-1779.
- Li, Z., Schulz, M. H., Look, T., Begemann, M., Zenke, M., and Costa, I. G. (2019). Identification of transcription factor binding sites using ATAC-seq. *Genome Biology* *20*, 45.
- Lieberman-Aiden, E., van Berkum, N. L., Williams, L., Imakaev, M., Ragoczy, T., Telling, A., Amit, I., Lajoie, B. R., Sabo, P. J., Dorschner, M. O., *et al.* (2009). Comprehensive mapping of long-range interactions reveals folding principles of the human genome. *Science* *326*, 289-293.
- Love, M. I., Huber, W., and Anders, S. (2014). Moderated estimation of fold change and dispersion for RNA-seq data with DESeq2. *Genome biology* *15*, 550.
- Record Owner, N. L. M. Condensin-driven remodelling of X chromosome topology during dosage compensation.

Reshmi, S. C., Harvey, R. C., Roberts, K. G., Stonerock, E., Smith, A., Jenkins, H., Chen, I. M., Valentine, M., Liu, Y., Li, Y., *et al.* (2017). Targetable kinase gene fusions in high-risk B-ALL: a study from the Children's Oncology Group. *Blood* *129*, 3352-3361.

Ross-Innes, C. S., Stark, R., Teschendorff, A. E., Holmes, K. A., Ali, H. R., Dunning, M. J., Brown, G. D., Gojis, O., Ellis, I. O., and Green, A. R. (2012). Differential oestrogen receptor binding is associated with clinical outcome in breast cancer. *Nature* *481*, 389.

Salameh, T. J., Wang, X., Song, F., Zhang, B., Wright, S. M., Khunsriraksakul, C., and Yue, F. (2019). A supervised learning framework for chromatin loop detection in genome-wide contact maps. *bioRxiv*, 739698.

Schep, A. N., Buenrostro, J. D., Denny, S. K., Schwartz, K., Sherlock, G., and Greenleaf, W. J. (2015). Structured nucleosome fingerprints enable high-resolution mapping of chromatin architecture within regulatory regions. *Genome Res* *25*, 1757-1770.

Servant, N., Varoquaux, N., Lajoie, B. R., Viara, E., Chen, C.-J., Vert, J.-P., Heard, E., Dekker, J., and Barillot, E. (2015). HiC-Pro: an optimized and flexible pipeline for Hi-C data processing. *Genome biology* *16*, 259.

Shen, Y., Yue, F., McCleary, D. F., Ye, Z., Edsall, L., Kuan, S., Wagner, U., Dixon, J., Lee, L., Lobanenkov, V. V., and Ren, B. (2012). A map of the cis-regulatory sequences in the mouse genome. *Nature* *488*, 116-120.

Wang, Y., Song, F., Zhang, B., Zhang, L., Xu, J., Kuang, D., Li, D., Choudhary, M. N., Li, Y., and Hu, M. (2018). The 3D Genome Browser: a web-based browser for visualizing 3D genome organization and long-range chromatin interactions. *Genome biology* *19*, 151.

Yang, T., Zhang, F., Yardimci, G. G., Song, F., Hardison, R. C., Noble, W. S., Yue, F., and Li, Q. (2017). HiCRep: assessing the reproducibility of Hi-C data using a stratum-adjusted correlation coefficient. *Genome Research* *27*, 1939-1949.

Zhang, Y., Liu, T., Meyer, C. A., Eeckhoute, J., Johnson, D. S., Bernstein, B. E., Nusbaum, C., Myers, R. M., Brown, M., Li, W., and Liu, X. S. (2008). Model-based analysis of ChIP-Seq (MACS). *Genome Biology* *9*, R137.

**Supplementary Table 1. Clinical characteristics of ALL patients included in *GATA3* sequencing**

| Features                         | Group                    | Ph-like ALL | Non Ph-like ALL | Other B-ALL |
|----------------------------------|--------------------------|-------------|-----------------|-------------|
|                                  |                          | N=143       | N=852           | N=4013      |
| Age at diagnosis (%)             | < 10 yrs                 | 48 (33.6)   | 410 (48.1)      | 2141 (53.4) |
|                                  | >= 10 yrs                | 93 (65.0)   | 434 (50.9)      | 1351 (33.7) |
|                                  | NA                       | 2 ( 1.4)    | 8 ( 0.9)        | 521 (13.0)  |
| Gender (%)                       | Female                   | 55 (38.5)   | 393 (46.1)      | 1837 (45.8) |
|                                  | Male                     | 88 (61.5)   | 459 (53.9)      | 2165 (53.9) |
|                                  | NA                       | 0 ( 0.0)    | 0 ( 0.0)        | 11 ( 0.3)   |
| Leukocyte count at diagnosis (%) | < 50x10 <sup>9</sup> /L  | 84 (58.7)   | 525 (61.6)      | 2497 (62.2) |
|                                  | >= 50x10 <sup>9</sup> /L | 57 (39.9)   | 319 (37.4)      | 996 (24.8)  |
|                                  | NA                       | 2 ( 1.4)    | 8 ( 0.9)        | 520 (13.0)  |
| Leukemia cell DNA index (%)      | < 1.16                   | 128 (89.5)  | 684 (80.3)      | 2606 (64.9) |
|                                  | >= 1.16                  | 13 ( 9.1)   | 161 (18.9)      | 802 (20.0)  |
|                                  | NA                       | 2 ( 1.4)    | 7 ( 0.8)        | 605 (15.1)  |

**Supplementary Table 2. Information of ALL PDXs used in this study**

| Patient ID | Xeno ID    | Sample ID     | Tumor Type | Tumor Subtype | Geno type | GATA3 Genotype | GATA3 Expression | Fusion       | PDX mouse ID           |
|------------|------------|---------------|------------|---------------|-----------|----------------|------------------|--------------|------------------------|
| #1         | PANZPJ     | SJBALL0 20579 | B-ALL      | Ph-like       | 0         | aa             | 11.24            | IGH-EPOR     | 28, 29, 30             |
| #2         | PANWJB     | SJBALL0 20589 | B-ALL      | Ph-like       | 0         | aa             | 11               | ATF7IP-JAK2  | 22, 23, 24, 25, 26, 27 |
| #3         | TB-00-1196 | SJBALL0 21102 | B-ALL      | Ph-like       | 1         | ac             | 7.99             | NoFusion     | 40, 41, 42             |
| #4         | PARJCY     | SJBALL0 20625 | B-ALL      | Ph-like       | 1         | ac             | 9                | ZC3HAV1-ABL2 | 19, 20, 21             |
| #5         | PASMNW     | SJBALL0 20980 | B-ALL      | Ph-like       | 1         | ac             | 9.2              | PAG1-ABL2    | 16, 17, 18             |
| #6         | TB-07-1094 | SJPHAL L008   | B-ALL      | BCR-ABL1      | 2         | cc             | 5                | BCR-ABL1     | 31, 32, 33             |
| #7         | TB-04-2227 | SJBALL2 05    | B-ALL      | NUTM1         | 2         | cc             | 4.39             | CUX1-NUTM1   | 34, 35, 36             |

**Supplementary Table 3. CIRPSR target sites and donor sequence for rs824662 knock-in in the GM12878 cell line**

| name                       | sequence (5'-3')                                                                                                                                           |
|----------------------------|------------------------------------------------------------------------------------------------------------------------------------------------------------|
| sgRNA target site          | ATGCACTG <b>C</b> AGCGTGTGGT                                                                                                                               |
| CRISPR/Cas9 donor template | TTCTTAGCCTAGGGTCCCCAGAGAGCCTTTGCTGTGCCCCAGAACCCCTGAGATTAAACACAAACACGCT <b>T</b> CAGTGCATG<br>CCAAAGGCGCCTTCCTAAGTACCCAACGGCTCTTCTCAGTTCCTGAAAAAGGCTCAGGCCT |

**Supplementary Table 4. Primers for quantitative PCR and cloning**

| <b>qrt-PCR primers</b> |                         |
|------------------------|-------------------------|
| <b>name</b>            | <b>sequence (5'-3')</b> |
| ACTB-rtF               | GTTGTCGACGACCAGCG       |
| ACTB-rtR               | GCACAGAGCCTCGCCTT       |
| GATA3-rtF              | TCACAAAATGAACGGACAGAACC |
| GATA3-rtR              | CAGCCTTCGCTTGGGCTTAAT   |
| CRLF2-rtF              | TGTCTCTCCTCCTTCTGTCTT   |
| CRLF2-rtR              | GGAAGTCCCTTGGTGTATCTC   |
| GAPDH-rtF              | GGAGCGAGATCCCTCCAAAAT   |
| GAPDH-rtR              | GGCTGTTGTCATACTTCTCATGG |
| TAF3-rtF               | ATGTGCGAGAGTTACTCCAGG   |
| TAF3-rtR               | GGGTCTGTTCCGGCCATAGAG   |
| GATA3-rtF              | GCCCCCTATTAAGCCCAAG     |
| GATA3-rtR              | TTGTGGTGGTCTGACAGTTCCG  |
| ITIH5-rtF              | CCTACTGTAGTACAACAAGCCAG |
| ITIH5-rtR              | TCCCAATGCTCTGTTCTCTATT  |
| SFMBT2-rtF             | AAAAGTGTCTCGGCTCAGCTA   |
| SFMBT2-rtR             | ACGTGTCCGGGTTGTTCTTAT   |

  

| <b>cloning primers</b>    |                                                         |
|---------------------------|---------------------------------------------------------|
| <b>name</b>               | <b>sequence (5'-3')</b>                                 |
| pGL4.23-GATA3_rs3824662-F | CCTAACTGGCCGGTACC<br>AGGAAAGAAGGCAGGAGAGA               |
| pGL4.23-GATA3_rs3824663-R | CCATTATATACCCTCTAGTGTCTAAGCTT<br>GGGTAGAAGAAGAGAACCAGTA |
| pGL4.23-GATA3_rs3781093-F | CCTAACTGGCCGGTACCGGATTGGGCTGGTAA<br>CCTTTAG             |
| pGL4.23-GATA3_rs3781093-R | CCATTATATACCCTCTAGTGTCTAAGCTTACCGC<br>ATCCGGACTCTATTA   |
| geno-rs3824662-F          | TATCACCCCTCCCCACCA                                      |
| geno-rs3824662-R          | GGAAAGCCCCAGATCAA                                       |

**Supplementary Table 5. Probe sequence for capture C experiments**

| name                    | sequence (5'-3')                                                   |
|-------------------------|--------------------------------------------------------------------|
| Capture-C forward probe | /5BiosG/ATGTCAGGCTGGGAGGTCCCCAGCACCAGGGTGCCAGGAGCCGGGTGGCAACCACGCT |
| Capture-C reverse probe | /5BiosG/CTTACCCCTGGAGAGTATCACAGGCCCCCAAGTGTGAACCCCTAGTTCCTCCTACTT  |



**Supplementary Table 6. Reads number of RNA-seq, ATAC-seq and ChIP-seq in engineered GM12872 cell lines and human ALL cell lines**

| Sample                  | Assay              | Replicate 1 | Replicate 2 | Correlation |
|-------------------------|--------------------|-------------|-------------|-------------|
| engineered A/A          | RNA-seq            | 45,135,802  | 25,739,447  | 0.91        |
| GM12878                 | RNA-seq            | 24,259,487  | 24,259,487  | 0.972       |
| engineered A/A          | ChIP-seq (GATA3)   | 24,153,278  | 26,697,412  | 0.823       |
| GM12878                 | ChIP-seq (GATA3)   | 26,119,622  | 5,793,654   | 0.861       |
| N6(GATA3 overexpressed) | ChIP-seq (GATA3)   | 18,449,418  | NA          | NA          |
| N6(Wild type)           | ChIP-seq (GATA3)   | 25,028,442  | NA          | NA          |
| engineered A/A          | ChIP-seq (H3K27ac) | 24,153,278  | NA          | NA          |
| GM12878                 | ChIP-seq (H3K27ac) | 31,462,410  | NA          | NA          |
| engineered A/A          | ChIP-seq (H3K4me1) | 46,686,984  | NA          | NA          |
| GM12878                 | ChIP-seq (H3K4me1) | 41,145,130  | NA          | NA          |
| N6(GATA3 overexpressed) | ATAC-seq           | 47,349,970  | 30,683,544  | 0.877       |
| N6 (Wild type)          | ATAC-seq           | 29,901,492  | 17,471,772  | 0.981       |
| engineered A/A          | ATAC-seq           | 9,592,068   | 39,949,966  | 0.832       |
| GM12878                 | ATAC-seq           | 18,642,355  | 17,427,448  | 0.909       |
| 697                     | ATAC-seq           | 39,055,034  | 19,074,354  | 0.9716      |
| MHHCAL4                 | ATAC-seq           | 97,070,070  | 36,774,588  | 0.9517      |
| MUTZ5                   | ATAC-seq           | 10,039,920  | 6,907,002   | 0.9348      |
| SEM                     | ATAC-seq           | 19,628,064  | 17,106,300  | 0.9572      |
| SUPB15                  | ATAC-seq           | 17,306,482  | 19,895,040  | 0.9569      |
| UOCB1                   | ATAC-seq           | 18,132,210  | 22,003,444  | 0.976       |

**Supplementary Table 7. Reads number of RNA-seq, ATAC-seq and ChIP-seq in ALL PDX samples**

| <b>Sample</b>          | <b>Assay</b> | <b>Replicate 1</b> |
|------------------------|--------------|--------------------|
| PDX17_A-C_SJBALL020980 | RNA-seq      | 146,360,710        |
| PDX19_A-C_SJBALL020625 | RNA-seq      | 103,250,506        |
| PDX23_AA_SJBALL020589  | RNA-seq      | 125,583,968        |
| PDX29_AA_SJBALL020579  | RNA-seq      | 197,024,688        |
| PDX31_CC_SJPHALL008    | RNA-seq      | 61,401,228         |
| PDX34_CC_SJBALL205     | RNA-seq      | 127,885,146        |
| PDX40_AC_SJBALL021102  | RNA-seq      | 101,083,624        |
| PDX17_A-C_SJBALL020980 | ATAC-seq     | 26,470,800         |
| PDX19_A-C_SJBALL020625 | ATAC-seq     | 29,299,466         |
| PDX23_AA_SJBALL020589  | ATAC-seq     | 30,213,231         |
| PDX29_AA_SJBALL020579  | ATAC-seq     | 27,725,249         |
| PDX31_CC_SJPHALL008    | ATAC-seq     | 27,725,249         |
| PDX34_CC_SJBALL205     | ATAC-seq     | 30,043,076         |
| PDX40_AC_SJBALL021102  | ATAC-seq     | 30,202,445         |
| PDX17_A-C_SJBALL020980 | ChIP-seq     | 26,524,384         |
| PDX19_A-C_SJBALL020625 | ChIP-seq     | 27,539,028         |
| PDX23_AA_SJBALL020589  | ChIP-seq     | 15,944,315         |
| PDX29_AA_SJBALL020579  | ChIP-seq     | 13,415,639         |
| PDX31_CC_SJPHALL008    | ChIP-seq     | 14,790,057         |
| PDX34_CC_SJBALL205     | ChIP-seq     | 14,805,006         |
| PDX40_AC_SJBALL021102  | ChIP-seq     | 13,378,167         |

**Supplementary Table 8. Reads number of Hi-C libraries in GM12878 and ALL PDX samples**

| Sample                 | Assay |      | useful_reads | cis_interaction | tran_interaction | cis_interaction>20kb | correlation |
|------------------------|-------|------|--------------|-----------------|------------------|----------------------|-------------|
| engineered A/A (49)    | Hi-C  | Rep1 | 309,055,073  | 221,422,151     | 87,632,922       | 172,346,444          | 0.926       |
| engineered A/A (7)     | Hi-C  | Rep2 | 238,327,534  | 238,327,534     | 67,632,938       | 133,937,841          |             |
| GM12878                | Hi-C  | Rep1 | 461,848,818  | 359,704,885     | 102,143,933      | 257,627,006          | 0.911       |
| GM12878                | Hi-C  | Rep2 | 104,779,887  | 81,752,318      | 23,027,509       | 58,039,429           |             |
| PDX17_A-C_SJBALL020980 | Hi-C  | Rep1 | 278,196,257  | 229,769,937     | 48,426,320       | 159,128,729          |             |
| PDX19_A-C_SJBALL020625 | Hi-C  | Rep1 | 249,173,169  | 216,029,066     | 33,144,103       | 150,159,056          |             |
| PDX23_AA_SJBALL020589  | Hi-C  | Rep1 | 621,592,890  | 545,596,312     | 75,996,578       | 332,074,940          |             |
| PDX29_AA_SJBALL020579  | Hi-C  | Rep1 | 475,527,653  | 412,460,038     | 63,067,615       | 251,809,325          |             |
| PDX31_CC_SJPHALL008    | Hi-C  | Rep1 | 399,989,579  | 350,354,228     | 49,635,351       | 238,734,093          |             |
| PDX34_CC_SJBALL205     | Hi-C  | Rep1 | 582,808,716  | 508,366,206     | 74,442,510       | 343,373,212          |             |
| PDX40_AC_SJBALL021102  | Hi-C  | Rep1 | 393,681,539  | 335,905,716     | 57,775,823       | 228,952,192          |             |

**A**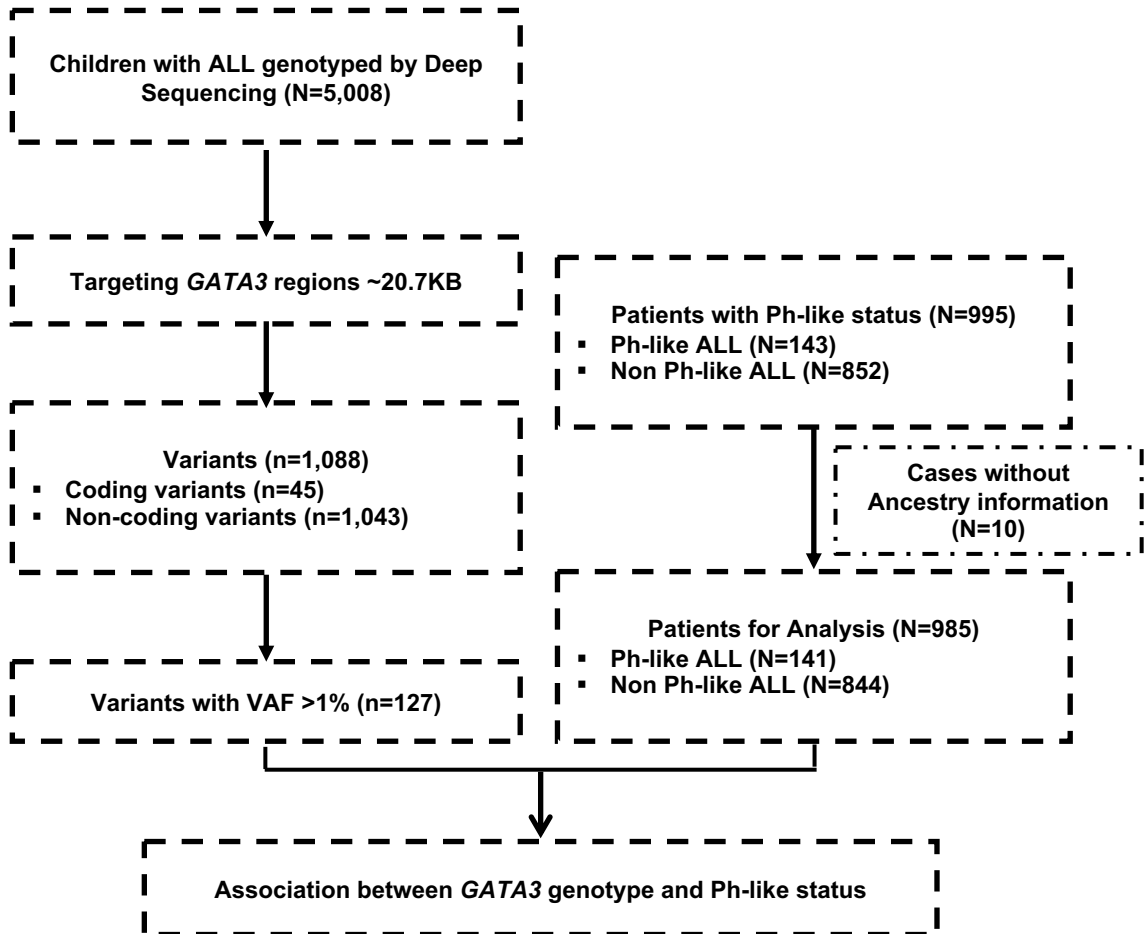**B**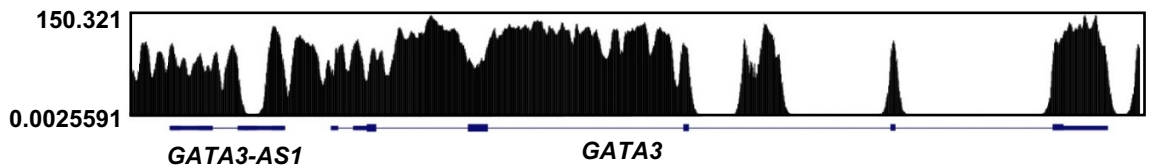

**Supplementary Figure 1. Targeted *GATA3* sequencing in 5,008 children with ALL.** **A**, Flow chart of Ph-like ALL risk variant discovery. *GATA3* variants were identified from 5,008 children with ALL, of whom 995 patients were examined for Ph-like subtype (143 Ph-like vs. 852 non-Ph-like ALL). A total of 127 variants with sufficient frequency were subjected to association test in this subset. **B**, Read density and coverage of the *GATA3* target region. We covered coding region, 3kb upstream of 5'UTR, 1kb after 3'UTR, and all predicted open chromatin regions (based on ATAC-seq data in GM12878 cells).

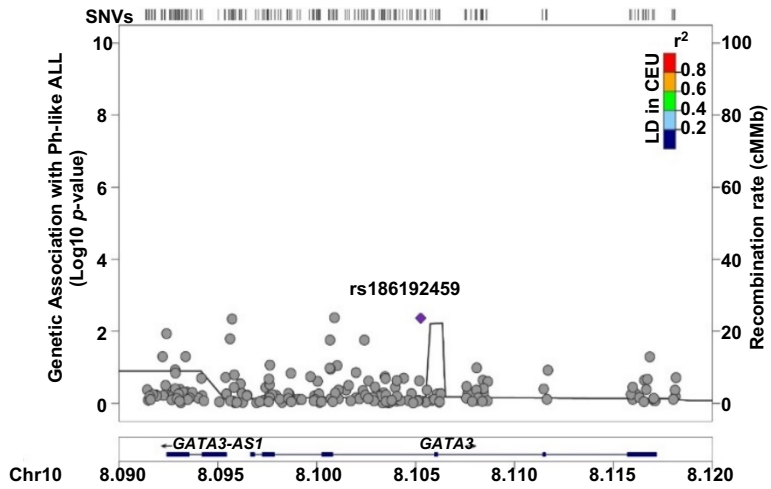

**Supplementary Figure 2. Multivariate analysis conditioning on rs3824662 revealed no independent signals reach the statistical significance to associate with Ph-like ALL susceptibility at the *GATA3* locus.**

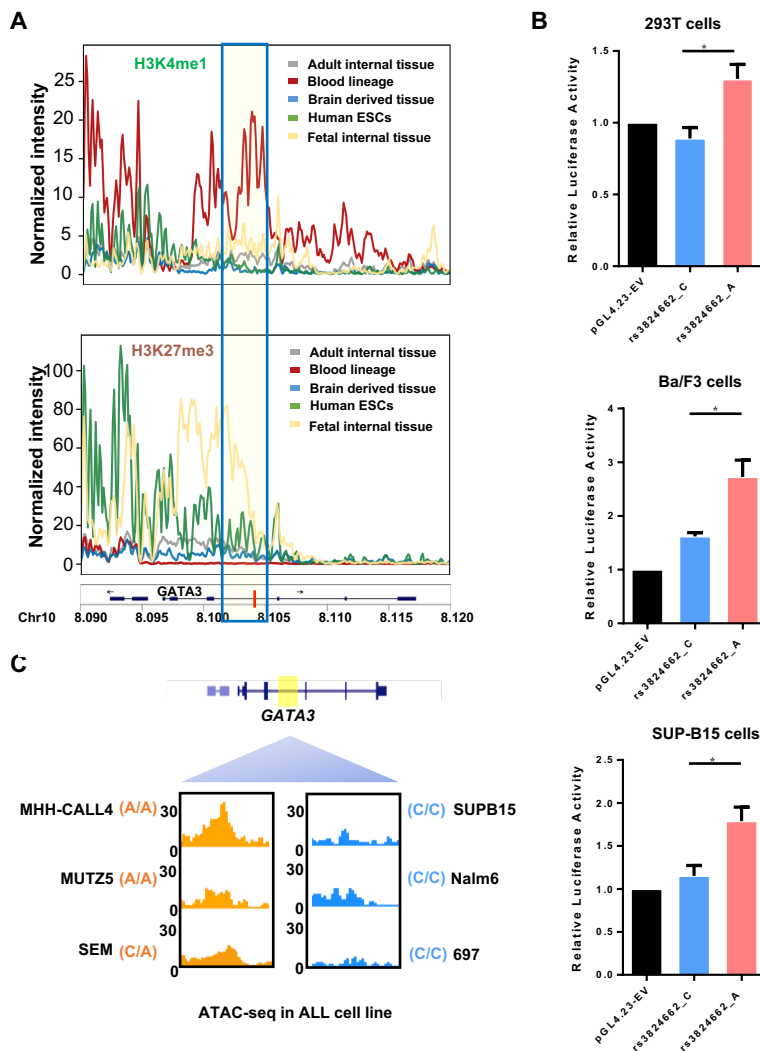

**Supplementary Figure 3. Histone signal, enhancer reporter assay and ATAC-seq analysis show rs3824662 risk A allele is associated with enhancer activity and open chromatin status in wildtype human cells, human blood tissue and human ALL cell lines A.**

Normalized intensity of H3K4me1 and H3K27me3 signal in 42 human tissues from ROADMAP data. **B.** Luciferase reporter assay comparing the enhancer activities of the fragments containing either the rs3824662 risk A allele or wildtype C allele in human normal 293T, mouse Ba/F3 and human SUP-B15 ALL cells. T bars indicate standard deviations (student t-test:  $p$  value =0.0167 for 293T;  $p$  value =0.0138 for Ba/F3;  $p$  value =0.0136 for SUP-B15). **C.** Open chromatin status at the rs3824662 locus in ALL cell lines representative of different subtypes, as determined using ATAC-seq. The window represents a 2kb region flanking rs3824662. MHH-CALL4 and MUTZ5 are *CRLF2*-rearranged with A/A genotype at the GATA3 SNP; SEM is *KTM2A* rearranged and with the C/A genotype, and the other three ALL cell lines have wildtype C/C genotype (SUPB15 is BCR-ABL1 ALL, Nalm6 is *DUX4*-rearranged, and 697 is *TCF3-PBX1* ALL).

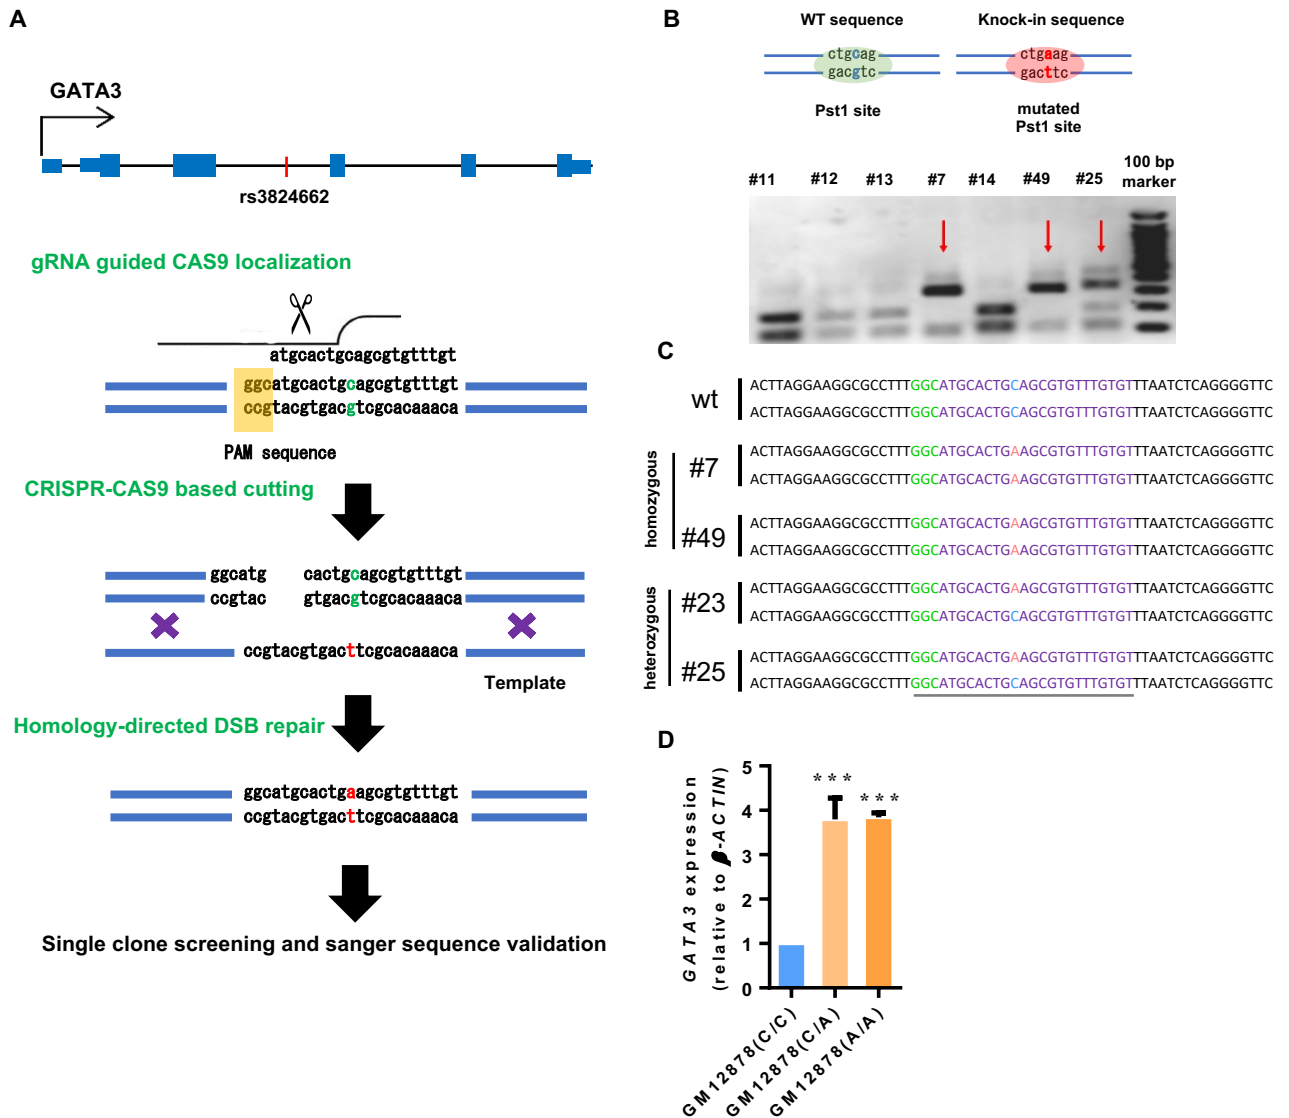

**Supplementary Figure 4. Knock-in of the rs3824662 risk A allele in GM12878 cell by using CRISPR/Cas9 editing.** **A**, CRISPR design for knock-in. A 120nt template single-strand DNA containing rs3824662 A allele and flanking sequence was used as the donor for homology-directed repair with CRISPR-Cas9 induced cutting sites. **B**, Pst1 restriction enzyme is used to screen GM12878 clones with homozygous or heterozygous genotype at rs3824662. **C**, Sanger sequence results of four successful CRISPR knock-in GM12878 clones. Clone #7 and #49 had knock-in in both alleles; clone #23 and #25 had knock-in in one allele. **D**, Real time qPCR of GATA3 expression in engineered GM12878 cells with wildtype, heterozygous, or homozygous genotype at rs3824662 ( $p$  value =0.0043 for C/A clones and  $p$  value <0.0001 for A/A clones by student  $t$ -test).

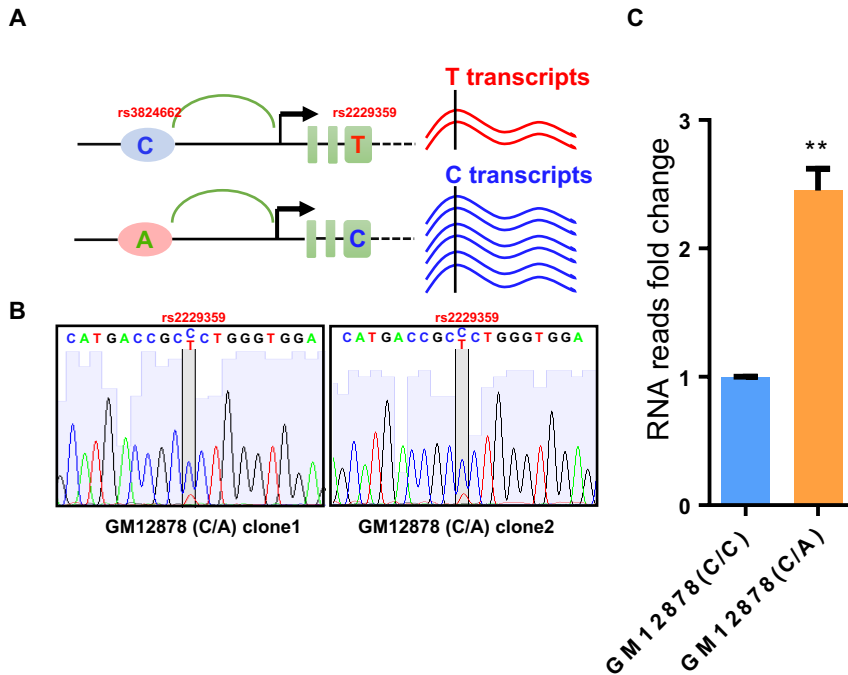

**Supplementary Figure 5. Design and detection of allelic-bias on GATA3 gene expression in GM12878 heterozygous clones.** **A.** GM12878 cells harbor a nonsynonymous variant (rs2229359 T/C) in GATA3 3rd exon, we performed PCR and Sanger sequencing and observed that the T allele at rs2229359 and A allele at rs3824662 are from the same allele. Therefore, allelic expression derived from rs2229359 would directly inform the differential transcription activation effects of the A vs. C allele at rs3824662 in engineered GM12878 clones. **B.** Sanger sequencing of PCR products of GATA3 3<sup>rd</sup> exon cDNA shows allelic expression of GATA3 in two GM12878 heterozygous clone cells by rs2229359 genotyping. **C.** Shown the transcription level associated with rs3824662-A allele vs. the transcript associated with wild type C allele ( $p$  value =0.0066 by student t-test).



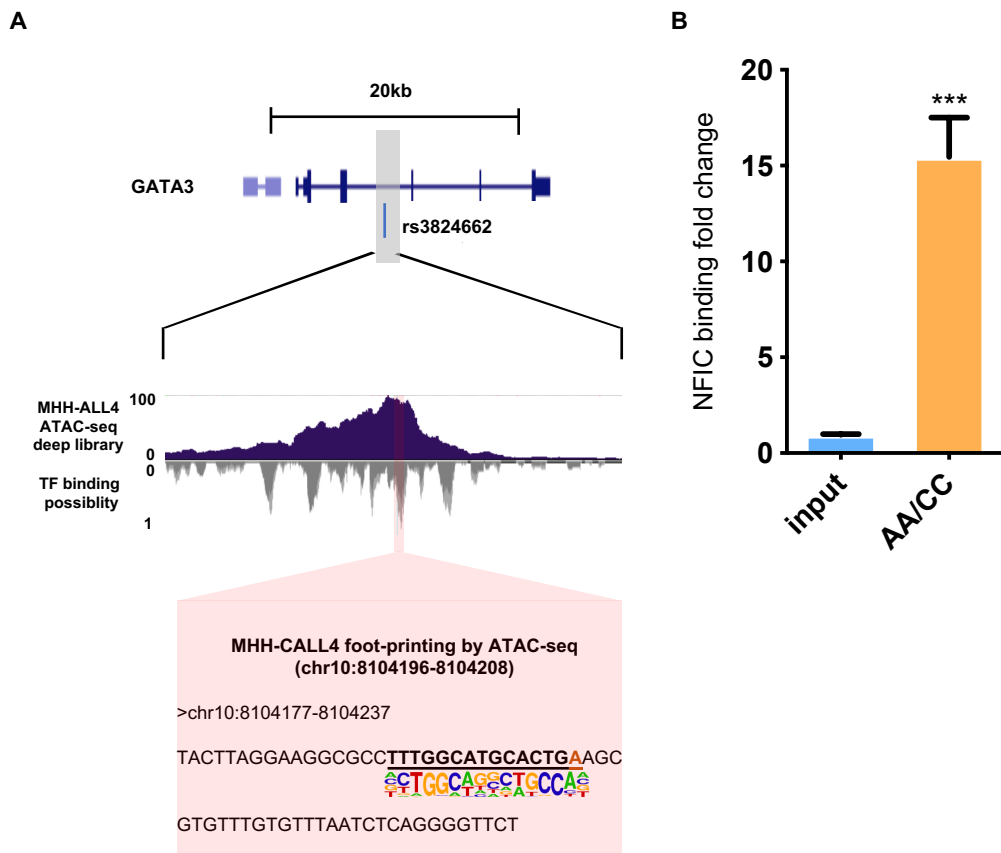

**Supplementary Figure 6. The rs3824662 risk A allele benefits NFIC binding. A,** Footprinting analysis using high-resolution ATAC-seq data showed that the NFIC binding motif is only identified in MHH-CALL4 Ph-like ALL cell line (A/A at rs3824662), but not in GM12878 (WT) cell line. **B,** Recruitment of NFIC binding in engineered GM12878 cells with the GM12878 (A/A) compared to GM12878 (C/C) cells, measured by ChIP-qPCR ( $p$  value =0.0003 by student t-test).

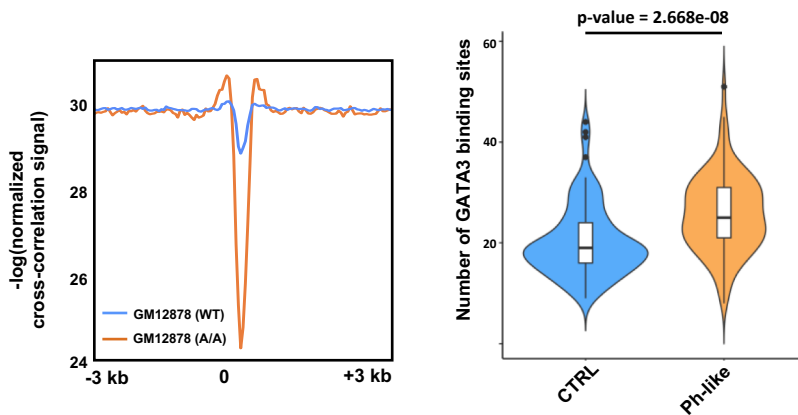

**Supplementary Figure 7. rs3824662 risk A allele induced GATA3 binding locus in the genome are devoid of nucleosomes and enriched in Ph-like genes. A,** Nucleosome position surrounding GATA3 binding peaks in GM12878 (WT) and engineered GM12878 (A/A) cells. Y axis indicates nucleosome position probability computed from ATAC-Seq and x-axis is the 6kb window for each GATA3 binding site. **B,** Enrichment of GATA3 binding at Ph-like ALL related genes compared with random control ( $p$  value = 0.0003 by wilcox.test) in engineered GM12878 (A/A) cells. Ph-like genes were defined as those most differentially expressed in this subtype than other ALL, as described previously (Roberts et al 2014).

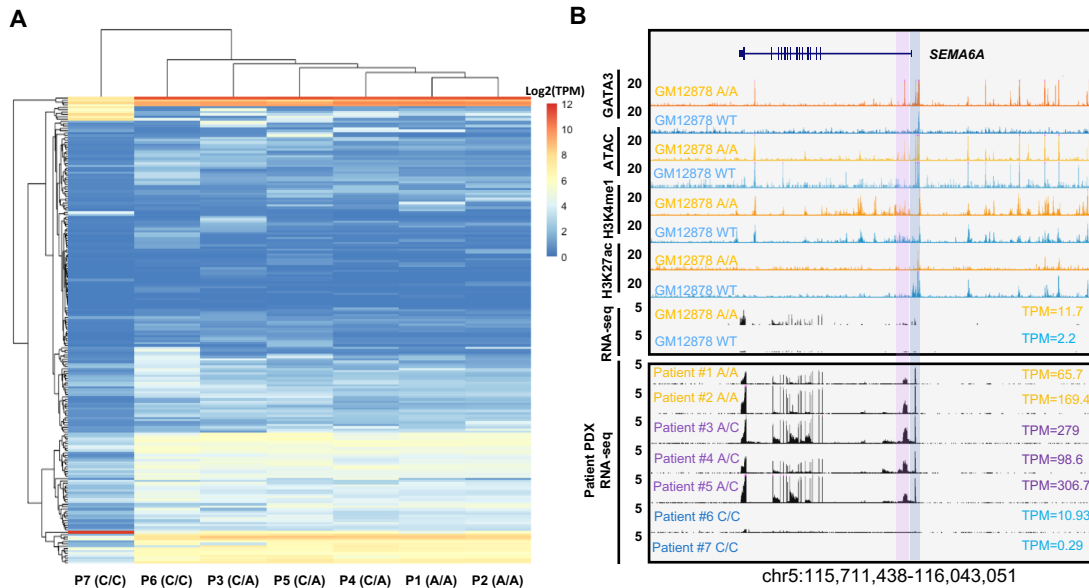

**Supplementary Figure 8. Risk A allele are also associated with ALL patient sample gene expression pattern. A.** Global gene expression clustering by normalized TPM shows patient sample containing A allele are clustered together (k means = 100). **B.** Ph-like gene *SEMA6A* is highly expressed in engineered GM12878 (A/A) cells (upper panel) and also PDX samples (bottom panel) with risk A alleles. GATA3 binding is enriched in *SEMA6A* promoter (TSS) and enhancer (predicted by H3K27ac signal) in engineered GM12878 (A/A) cells. Blue bar and pink bar labels promoter and enhancer, respectively.

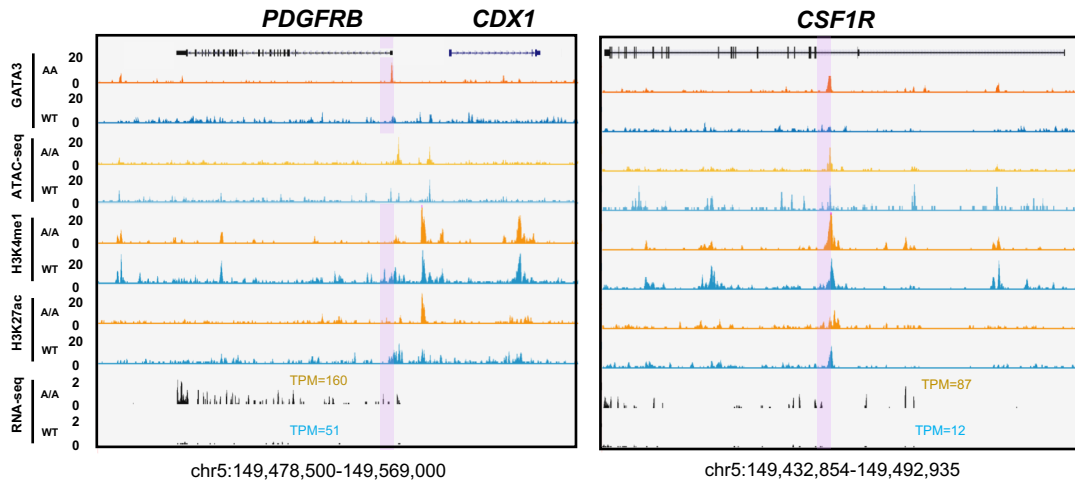

**Supplementary Figure 9.** ATAC-seq, ChIP-Seq and RNA-seq for GATA3 in in GM12878 (WT) and engineered GM12878 (A/A) cells at the *PDGFRB* and *SEMA6A* loci (Read densities (y axis) normalized by sequencing depths). Pink bar indicates GATA3 binding in enhancer area.

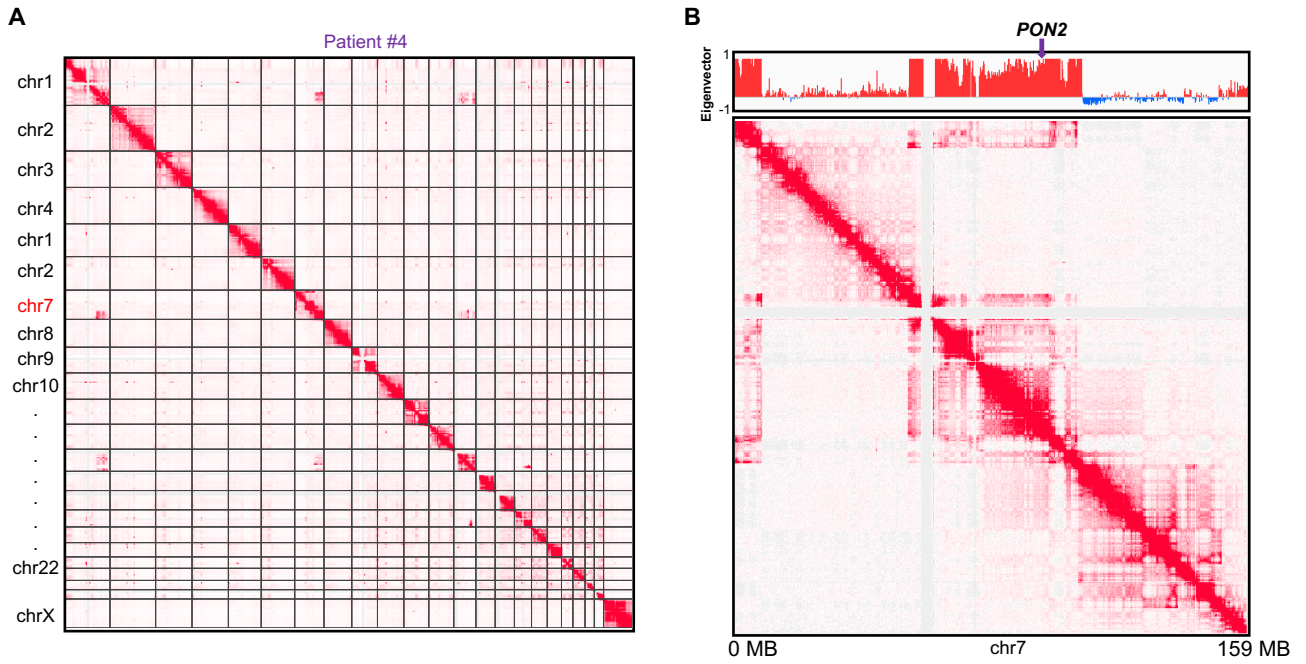

**Supplementary Figure 10.** interchromosomal (**A**) and intrachromosomal (**B**) rearrangements in chromosome Patient #4 indicated by Hi-C heatmap. B up panel showed the abnormal compartment state in chr7.

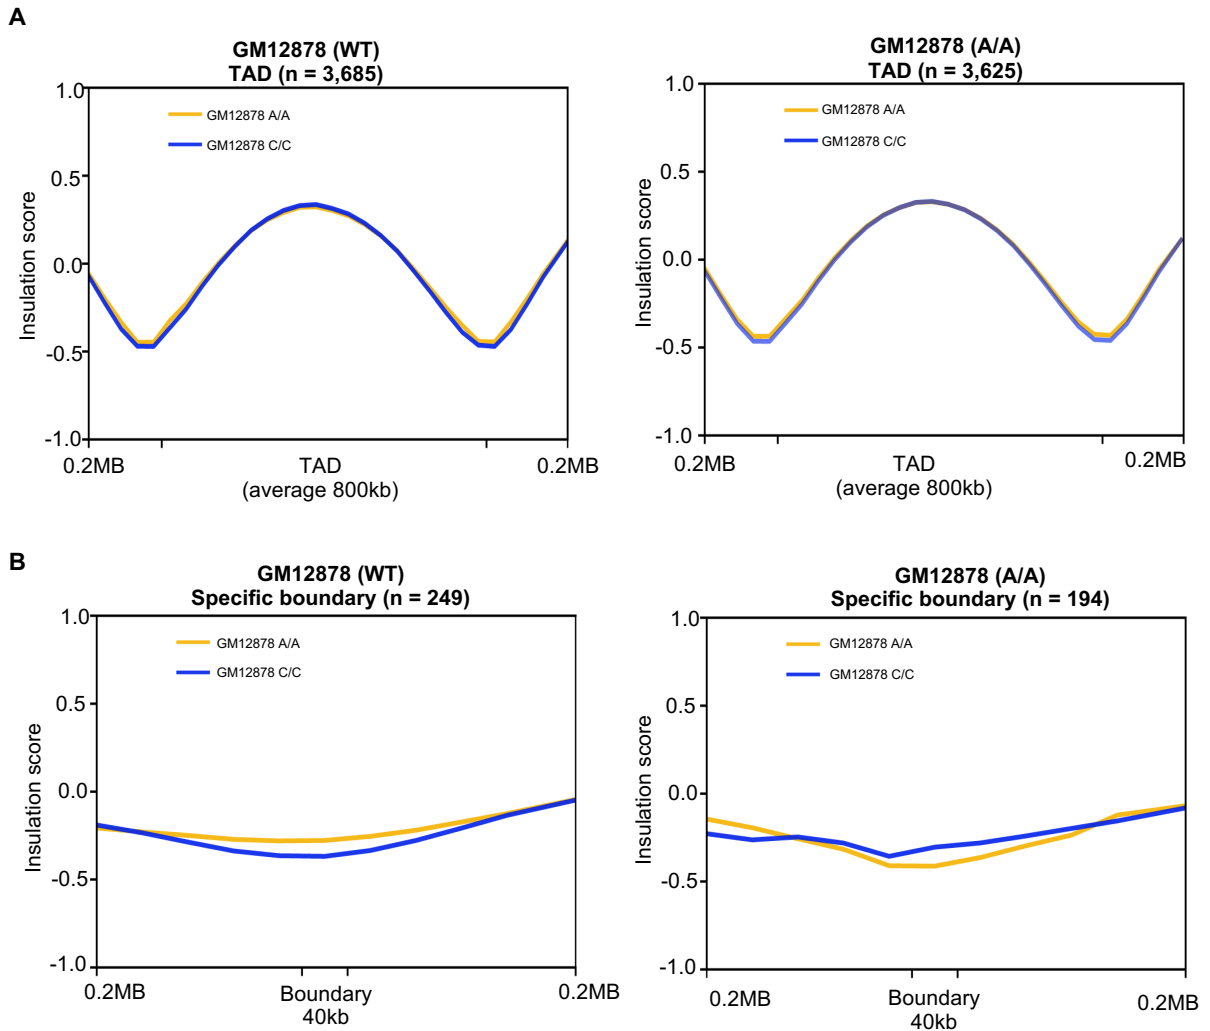

**Supplementary Figure 11. TAD structure is consistent in GM12878 (WT) and engineered GM12878 (A/A) cells.** **A**, Average insulation score shows no significant difference in GM12878 cells with different rs3824662 genotype. Left panel: Insulation score from GM12878 (WT) Hi-C result (blue line) and engineered GM12878 (A/A) Hi-C result (yellow line) in GM12878 (WT) TADs. Right panel: Insulation score from GM12878 (WT) Hi-C result (blue line) and engineered GM12878 (A/A) Hi-C result (yellow line) in GM12878 (A/A) TADs. **B**, Average insulation score shows no significant difference in GM12878 (WT) Hi-C (blue line) and engineered GM12878 (A/A) Hi-C (yellow line) in GM12878 (WT) specific TAD boundaries. Left panel: Insulation score from GM12878 (WT) Hi-C (blue line) and GM12878 (A/A) Hi-C (yellow line) in GM12878 (C/C) TAD boundaries. Right panel: Insulation score from GM12878 (WT) Hi-C (blue line) and GM12878 (A/A) Hi-C (yellow line) in GM12878 (WT) TAD boundaries.

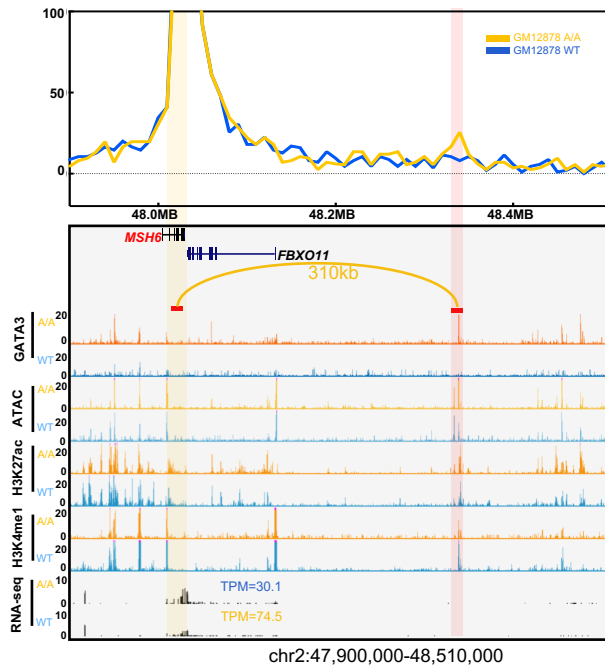

**Supplementary Figure 12.** Virtual 4-C analysis in 10kb resolution shows there is a A/A genotype-specific chromatin looping between the *MSH6* locus (yellow bar) and one predicted enhancer 310kb away (pink bar) in engineered GM12878 (A/A) cells (related to figure 4a).

A

**Ph-like ALL patient translocation breakpoints ChIP-seq Motif**

| TF name | Motif         | p-value |
|---------|---------------|---------|
| ZNF263  | TGTAGAGGACCG  | 1e-32   |
| GATA3   | GTCACCTGTCTCT | 1e-10   |
| YY2     | GAATGGCG      | 1e-5    |

B

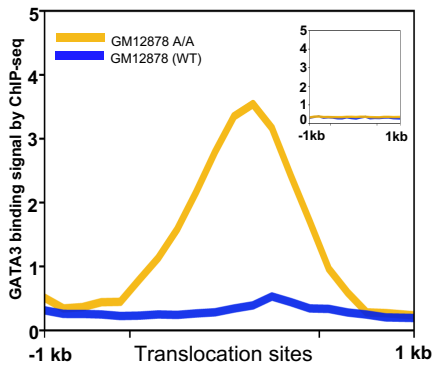

C

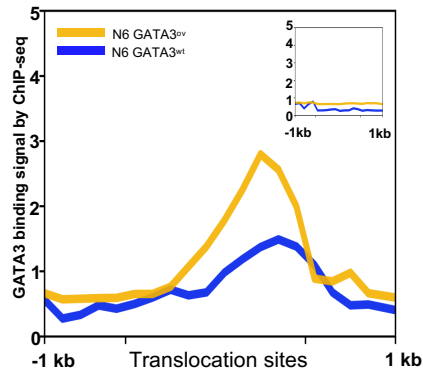

**Supplementary Figure 13. GATA3 involved in translocation in Ph-like ALL.** **A**, Motif enrichment analysis of Ph-like ALL patient translocation breakpoints genomic regions. **B**, GATA3 binding signal (200bp bin) in Ph-like ALL patient translocation breakpoints region by ChIP-seq (+/- 1kb) in engineered GM12878 (A/A) (yellow) and GM12878 (WT) cells (blue). Upright panel is GATA3 binding signal in 1000 random genomic regions in GM12878 A/A and WT cells. **C**, GATA3 binding signal (200bp bin) in Ph-like ALL patient translocation breakpoints region by ChIP-seq (+/- 1kb) in Nalm6 GATA3<sup>ov</sup> (yellow) and Nalm6 GATA3<sup>wt</sup> (blue) cells. Upright panel is GATA3 binding signal in 1000 random genomic regions in Nalm6 GATA3<sup>ov</sup> (yellow) and Nalm6 GATA3<sup>wt</sup> (blue) cells.



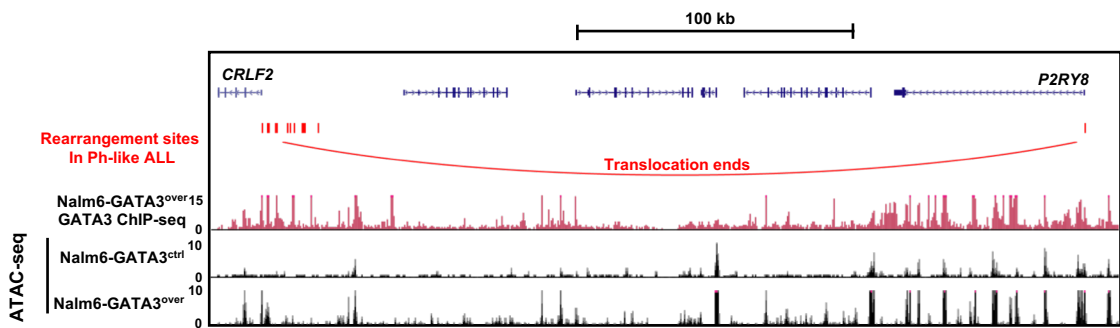

**Supplementary Figure 14. GATA3 ChIP-seq and ATAC-seq in Nalm6 with or without ectopic GATA3 expressed at the *CRLF2* locus.** Red vertical bars indicate the rearrangement hotspots in *CRLF2*-positive Ph-like ALL. ChIP-seq and ATAC signal intensities were normalized according to their sequencing depths.

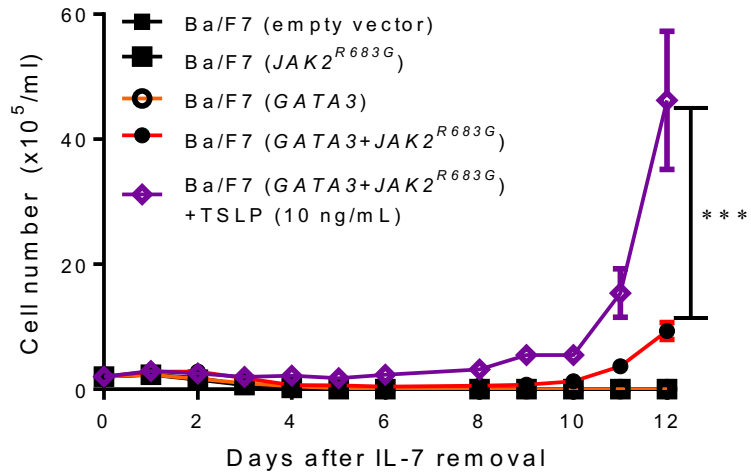

**Supplementary Figure 15. IL3-independent growth of Ba/F7 cells transduced with *GATA3* alone, *JAK2<sup>R683G</sup>* alone, *GATA3* with *JAK2<sup>R683G</sup>*, or empty vector control.** All the experiments were performed in triplicates ( $p$  value < 0.001 by 2way ANOVA). Ba/F7 cells with *GATA3* and *JAK2<sup>R683G</sup>* were treated with or without 10 ng/ml TSLP. All the experiments were performed in triplicate for three times independently ( $p$  value < 0.001 by 2way ANOVA).

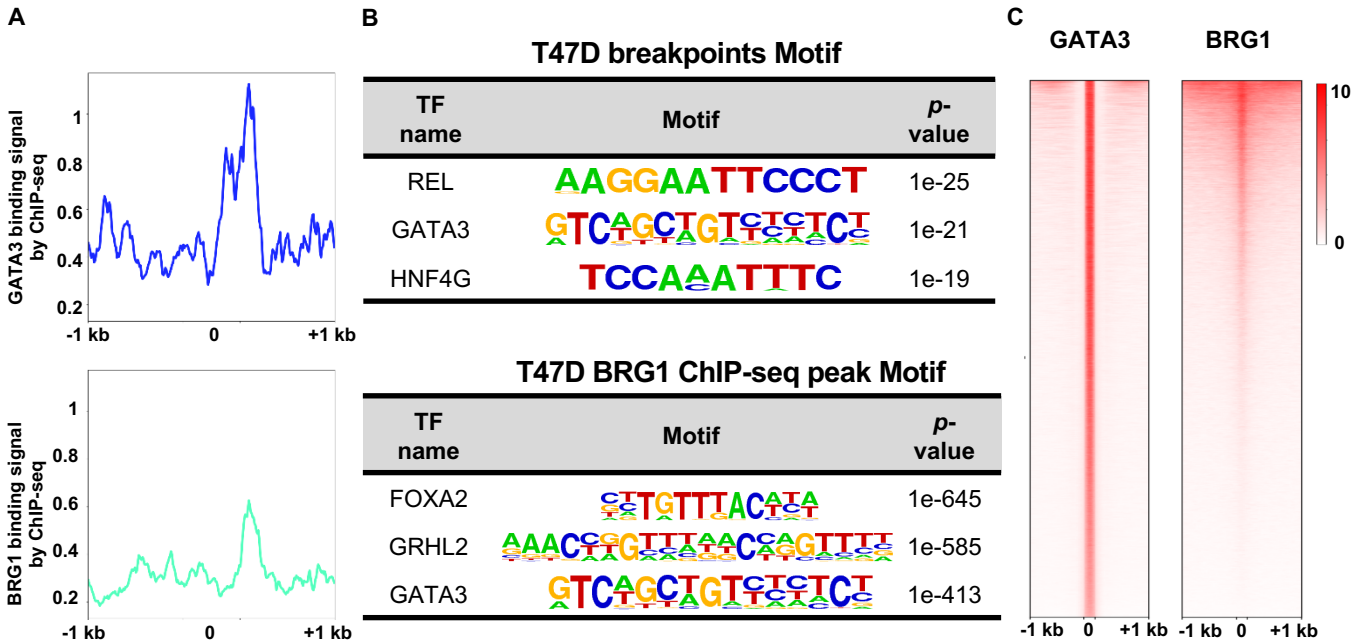

**Supplementary Figure 16. GATA3 involved in translocation in breast cancer cell line.** **A**, GATA3 and BRG1 binding signal in T47 breakpoints region by ChIP-seq (+/- 1kb). **B**, Motif enrichment analysis of T47D breakpoints genomic regions and BRG1 ChIP-seq peak region. **C**, Heatmap of GATA3 and BRG1 binding signal in GATA3 binding peaks (+/- 1 kb) in T47D cell.
